# Supplementary material for: Interaction of germanium analogue of organic isonitrile with Cu(i) imide in side-on mode
Source: Royal Society of Chemistry journal article supplement (doi:10.1039/d3dt02094k), 2023-01-01
Supplement: d3dt02094k1.pdf [file d3dt02094k1.pdf]

Supporting Information

## Interaction of Germanium Analogue of Organic Isonitrile with Cu(I) imide in Side-on Mode

Shuai-Cong Huo,<sup>a</sup> Yao Li,<sup>a</sup> Peng-Fei Ji,<sup>a</sup> De-Xiang Zhang,<sup>a</sup> Ying Yang,<sup>\*a</sup> and Herbert W. Roesky<sup>\*b</sup>

<sup>a</sup>School of Chemistry and Chemical Engineering, Central South University, Lushan Road 932, 410083 Changsha, China

<sup>b</sup>Institut für Anorganische Chemie, Universität Göttingen, Tammannstrasse 4, 37077 Göttingen, Germany

## Content

|                                                                                            |    |
|--------------------------------------------------------------------------------------------|----|
| Experimental Section.....                                                                  | 1  |
| Fig. S 1 <sup>1</sup> H NMR spectrum of 1.....                                             | 5  |
| Fig. S 2 <sup>13</sup> C{ <sup>1</sup> H} NMR spectrum of 1.....                           | 5  |
| Fig. S 3 <sup>1</sup> H NMR spectrum of 2.....                                             | 6  |
| Fig. S 4 <sup>13</sup> C{ <sup>1</sup> H} NMR spectrum of 2.....                           | 6  |
| Fig. S 5 <sup>1</sup> H NMR spectrum of 3.....                                             | 7  |
| Fig. S 6 <sup>13</sup> C{ <sup>1</sup> H} NMR spectrum of 3.....                           | 7  |
| Fig. S 7 Contribution of atoms to HOMO (left) and LUMO (right) of 1' by NAO analysis.....  | 8  |
| Fig. S 8 Selected Wiberg bond orders of 1'.....                                            | 11 |
| Fig. S 9 Selected natural charges (a) and hybrids (b) of 1'.....                           | 13 |
| Fig. S 10 Electron localization function (ELF) graph of 1'.....                            | 14 |
| Fig. S 11 The contour map of electron density difference of 1'.....                        | 14 |
| Fig. S 12 Contribution of atoms to HOMO (left) and LUMO (right) of 3' by NAO analysis..... | 15 |
| Fig. S 13 Selected Wiberg bond orders of 3'.....                                           | 18 |
| Fig. S 14 Selected natural charges (a) and hybrids (b) of 3'.....                          | 21 |
| Fig. S 15 The contour map of electron density difference of 3'.....                        | 23 |
| Fig. S 16 Molecular structure of [NHC→LiN(H)Ar] <sub>2</sub> (2).....                      | 25 |
| Fig. S 17 Molecular structure of ArNNAr (4).....                                           | 25 |
| Table S 1 Optimized geometry of 1'.....                                                    | 26 |
| Table S 2 Optimized geometry of 3'.....                                                    | 28 |
| Table S 3 Crystal data and structural refinement (1-4).....                                | 32 |
| References.....                                                                            | 33 |

## Experimental Section

### General procedures

All manipulations were carried out in a standard Schlenk technology in a dry argon atmosphere or in the glovebox (Mikrona Super 1220/750/900) with oxygen content less than 0.1 ppm. Solvents needed for synthesis in the laboratory were pre-dried with the molecular sieve 4Å for 3 days, then added with appropriate Na/K alloy and benzophenone, heated, and refluxed to make the solvents dark blue or purple. After distillation, the solvents were stored in anhydrous and oxygen-free solvent bottles in the argon atmosphere for reserve. Reagents involved in this article were purchased from Aladdin without special instructions.

The melting point of obtained compounds was measured on a digital display micro melting point meter (X-4B<sup>+</sup>). Infrared spectra were recorded by using KBr pellets with a NEXUS670 (Thermo Fisher Scientific) FT-IR spectrometer. The <sup>1</sup>H and <sup>13</sup>C{<sup>1</sup>H} NMR spectra were measured on a Bruker Advance II 400 MHz NMR instrument at ambient temperature. Elemental analyses for carbon, hydrogen, and nitrogen were performed with a Thermo Quest Italia SPA EA1110 instrument.

### NHC→Ge[N(H)Ar]<sub>2</sub> (**1**)

In a glove box LiN(H)Ar (2.041 g, 8 mmol, Ar = 2,6-*i*Pr<sub>2</sub>(C<sub>6</sub>H<sub>3</sub>)),<sup>1</sup> GeCl<sub>2</sub>·dioxane (0.926 g, 4.0 mmol), and N-heterocyclic carbene (NHC, 0.721 g, 4 mmol)<sup>2</sup> were weighed into a 100 mL Schlenk flask. 25 mL of anhydrous ethyl ether was introduced on a vacuum line using a double needle. After 12 h of continuous stirring at room temperature, a white precipitate was produced and the filtrate was concentrated to 5 mL after filtration. The solution was left to stand for 1 day, and yellow crystals of **1** were formed (1.937 g, 3.2 mmol, 80%).

**M.p.:** 135.2-135.6°C. **<sup>1</sup>H NMR** (400 MHz, C<sub>6</sub>D<sub>6</sub>, 298 K, ppm): δ 7.21 (d, *J* = 7.6 Hz, 4H, ArH), 6.96 (t, *J* = 7.6 Hz, 2H, ArH), 5.98 (br, 2H, NH), 4.34 (m, 2H, CHMe<sub>2</sub>), 3.51 (sept, *J* = 6.7 Hz, 4H, CHMe<sub>2</sub>), 1.54 (s, 6H, CMe), 1.34 (d, *J* = 6.8 Hz, 24H, CHMe<sub>2</sub>), 1.12 (d, *J* = 5.6 Hz, 12H, CHMe<sub>2</sub>). **<sup>13</sup>C{<sup>1</sup>H} NMR** (101 MHz, C<sub>6</sub>D<sub>6</sub>, 298 K, ppm) δ 148.0, 136.6, 123.5, 117.7 (Ar), 28.9 (CHMe<sub>2</sub>), 28.2 (CHMe<sub>2</sub>), 24.5 (CHMe<sub>2</sub>), 22.6 (CHMe<sub>2</sub>), 9.8 (CMe). **FT-IR** (cm<sup>-1</sup>): ν 3348.6 (m), 2955.13 (vs), 1468.12 (s), 1468.23 (w), 1346.25 (m), 1325.49 (s), 1236.35 (w), 1115.35 (w), 845.18 (vw), 817.47 (s), 737.21 (w), 676.38 (vw), 615.08 (w). **EA:** calcd. for C<sub>35</sub>H<sub>56</sub>GeN<sub>4</sub> (605.49): C, 69.43; H, 9.32; N, 9.25%; found C, 69.29; H, 9.14; N, 9.41%.

**[NHC→LiN(H)Ar]<sub>2</sub> (2)**: To a solution of H<sub>2</sub>NAr (0.2 mL, 1 mmol, Ar = 2,6-*i*Pr<sub>2</sub>(C<sub>6</sub>H<sub>3</sub>)) and NHC (0.181 g, 1 mmol, NHC = C[N(*i*Pr)CMe]<sub>2</sub>) in 25 mL of anhydrous ethyl ether solvent at 0 °C was added dropwise *n*BuLi (0.4 mL, 2.5 M, 1 mmol) to form a colorless solution. The mixture was warmed to room temperature and kept stirring for 6 h. Hexane (25 mL) was layered on the solution to obtain the product **2** (0.530 g, 0.73 mmol) in 73% yield as colorless crystals after filtration.

**M.p.**: 124.7-125.9°C. **<sup>1</sup>H NMR** (400 MHz, C<sub>6</sub>D<sub>6</sub>, 298 K, ppm): δ 7.22 (d, *J* = 7.4 Hz, 4H, *ArH*), 6.72 (t, *J* = 7.4 Hz, 2H, *ArH*), 4.47 (m, 4H, *CHMe*<sub>2</sub>), 3.51 (m, 4H, *CHMe*<sub>2</sub>), 1.60 (s, 12H, *CMe*), 1.51 (d, *J* = 6.8 Hz, 24H, *CHMe*<sub>2</sub>), 1.15 (d, *J* = 6.8 Hz, 24H, *CHMe*<sub>2</sub>). **<sup>13</sup>C{<sup>1</sup>H} NMR** (101 MHz, C<sub>6</sub>D<sub>6</sub>, 298 K, ppm): δ 158.2, 132.3, 131.3, 123.1, 122.8, 110.4 (*Ar*), 28.9 (*CHMe*<sub>2</sub>), 28.1 (*CHMe*<sub>2</sub>), 24.1 (*CHMe*<sub>2</sub>), 22.6 (*CHMe*<sub>2</sub>), 9.6 (*CMe*). **FT-IR** (cm<sup>-1</sup>): ν 2961.59 (m), 2931.29 (m), 2867.94 (w), 1457.69 (m), 1438.41 (m), 1410.86 (m), 1342.00 (s), 1308.95 (s), 1256.62 (s), 1129.92 (w), 1099.62 (m), 733.28 (s), 645.14 (m), 587.30 (m), 523.95 (s). **EA**: calcd. for C<sub>46</sub>H<sub>74</sub>Li<sub>2</sub>N<sub>6</sub> (726.64): C, 76.20; H, 10.26; N, 11.59%; found C, 76.13; H, 9.96; N, 11.32%.

**[NHC→GeN(Ar)Cu<sub>2</sub>NAr]<sub>2</sub> (3)**: The precursor germylene NHC→Ge[N(H)Ar]<sub>2</sub> (**1**) (2 mmol) was lithiated *in situ* using *n*BuLi (4.3 mmol, 1.7 mL, 2.5 M) in 50 mL of anhydrous ethyl ether solvent and then mixed with CuCl(PPh<sub>3</sub>)<sub>3</sub> (3.536 g, 4 mmol). The reaction was carried out at room temperature for 12 h. After workup, the white precipitate was filtered off and the filtrate was concentrated to 10 mL and chilled under 4°C in the refrigerator for 1 day before producing dark yellow crystals of **3** (1.161 g, 0.80 mmol, 40%).

**M.p.** 150.3-150.6°C. **<sup>1</sup>H NMR** (400 MHz, C<sub>6</sub>D<sub>6</sub>, 298 K, ppm): δ 7.05 (d, *J* = 7.6 Hz, 8H, *ArH*), 6.90 (t, *J* = 7.6 Hz, 4H, *ArH*), 3.83 – 3.76 (m, 4H, *CHMe*<sub>2</sub>), 2.64 (m, *J* = 6.8 Hz, 8H, *CHMe*<sub>2</sub>), 1.28 (d, 12H, *CHMe*<sub>2</sub>), 1.27 (d, *J* = 2.6 Hz, 24H, *CHMe*<sub>2</sub>), 1.15 (d, *J* = 6.8 Hz, 48H, *CHMe*<sub>2</sub>). **<sup>13</sup>C{<sup>1</sup>H} NMR** (101 MHz, C<sub>6</sub>D<sub>6</sub>, 298 K, ppm): δ 137.9, 129.3, 128.5, 123.1, 118.9 (*Ar*), 28.1 (*CHMe*<sub>2</sub>), 24.2 (*CHMe*<sub>2</sub>), 22.6 (*CHMe*<sub>2</sub>), 21.4 (*CHMe*<sub>2</sub>), 8.5 (*CMe*). **FT-IR** (cm<sup>-1</sup>): ν 2957.23 (vs), 1468.12 (s), 1468.23 (w), 1346.25 (m), 1325.49 (s), 1236.35 (w), 1115.35 (w), 845.18 (vw), 817.47 (s), 737.21 (w), 676.38 (vw), 615.08 (w). **EA**: calcd. for C<sub>70</sub>H<sub>110</sub>Cu<sub>4</sub>Ge<sub>2</sub>N<sub>8</sub> (1463.15): C, 57.46; H, 7.58; N, 7.66%; found C, 57.34; H, 7.35; N, 7.52%.

**ArNNAr (4)**: In an extended reaction study of lithiated **1** with other metal halides (i.e. PbCl<sub>2</sub>), a side product ArNNAr (**4**) was unexpectedly isolated as from the complicated reaction mixture under mild conditions. In a typical synthesis, the precursor germylene NHC→Ge[N(H)Ar]<sub>2</sub> (**1**)

(2 mmol) was lithiated *in situ* using *n*BuLi (1.7 mL, 2.5 M, 4.3 mmol) in 50 mL of anhydrous ethyl ether solvent and then mixed with PbCl<sub>2</sub> (0.556 g, 2 mmol). The reaction was carried out at room temperature for 12 h. After workup, the white precipitate was filtered off. The colorless crystals of **4** were obtained under 4 °C from the concentrated filtrate (about 3 mL) of the reaction mixture, after 4 days standing. The solid structure of diazo compound **4** in *trans* arrangement was confirmed by single crystal X-ray diffraction (Fig. S17), which have been previously reported with different arrangement<sup>8</sup> or different space group.<sup>9</sup>

The reactivity of **1** as well as the formation of **4** deserve further in-depth investigation.

### X-ray crystallographic analysis

The crystallographic data were measured on a Bruker SMART APEX II CCD single crystal diffractometer with MoK $\alpha$  radiation. The data were refined by SHELXL<sup>3</sup> and OLEX2,<sup>10</sup> and all non-proton coordinate values and anisotropic temperature factors were refined by the full-matrix least-squares method. All proton positions in the structure were determined by theoretical calculation.

*As for compound 3, the crystallographer pointed out that the ADP (atomic displacement parameters) of Ge(1) is visibly 'larger' than that of Cu(2) and the residual density suggested over-assignment of Ge. When refined freely, the occupancy of Ge will refine to 93%. Refining the occupancy of both Ge and Cu atoms freely will reduce the R<sub>1</sub> to 4.9%, with occupancies as follows:*

| Atom  | Typ<br><i>e</i> | X     | Y     | Z     | U <sub>eq</sub> | U <sub>m</sub> | U <sub>vol</sub> | ChemOccu | R-bond | R-VdW |
|-------|-----------------|-------|-------|-------|-----------------|----------------|------------------|----------|--------|-------|
| Ge(1) | Ge              | 0.418 | 0.157 | 0.382 | 0.057           | 0.057          | 0.056            | 0.885    | 1.22   | 2     |
| Cu(2) | Cu              | 0.468 | 0.021 | 0.369 | 0.044           | 0.043          | 0.038            | 0.917    | 1.28   | 1.4   |
| Cu(1) | Cu              | 0.378 | 0.049 | 0.511 | 0.046           | 0.045          | 0.040            | 0.948    | 1.28   | 1.4   |

*This could be due to the crystal that was too large (0.8×0.71×0.59 mm<sup>3</sup>), with an absorption coefficient  $\mu$  of 2. The results of this crystal analysis are recommended to be treated with caution.*

Crystal data and structural refinement are summarized in Table S3. CCDC 2201109~2201112 contain the supplementary crystallographic data for this paper. These data can be obtained free of charge from The Cambridge Crystallographic Data Centre. The Director, CCDC, 12 Union Road, Cambridge CB2 1EZ, UK [Fax: (internat.) +44-1223/336-033; E-mail: deposit@ccdc.cam.ac.uk].

## Computational Details

All quantum chemical calculations were carried out using the Gaussian 16 program suite.<sup>4</sup> The NBO calculations were performed with the Version 6.0 of the NBO program<sup>5</sup> which was implemented in the Gaussian16 C.01 and analyzed using Multiwfn software package.<sup>6</sup> The molecular structure optimizations were performed using the PBE1PBE/genecp functional<sup>7</sup> along with the def2-tzvp basis set for the elements Ge and Cu and def2SVP basis set for the elements C, N, and H. Constraints of heavy-atom positions were employed in the geometry optimization of **3'**, since otherwise the full optimization resulted in a severe prolongation of the Ge-C bond and a large deviation from the N-Ge-C linearity. Every stationary point was identified by a subsequent frequency calculation as minimum (Number of imaginary frequencies (NIMAG): 0).

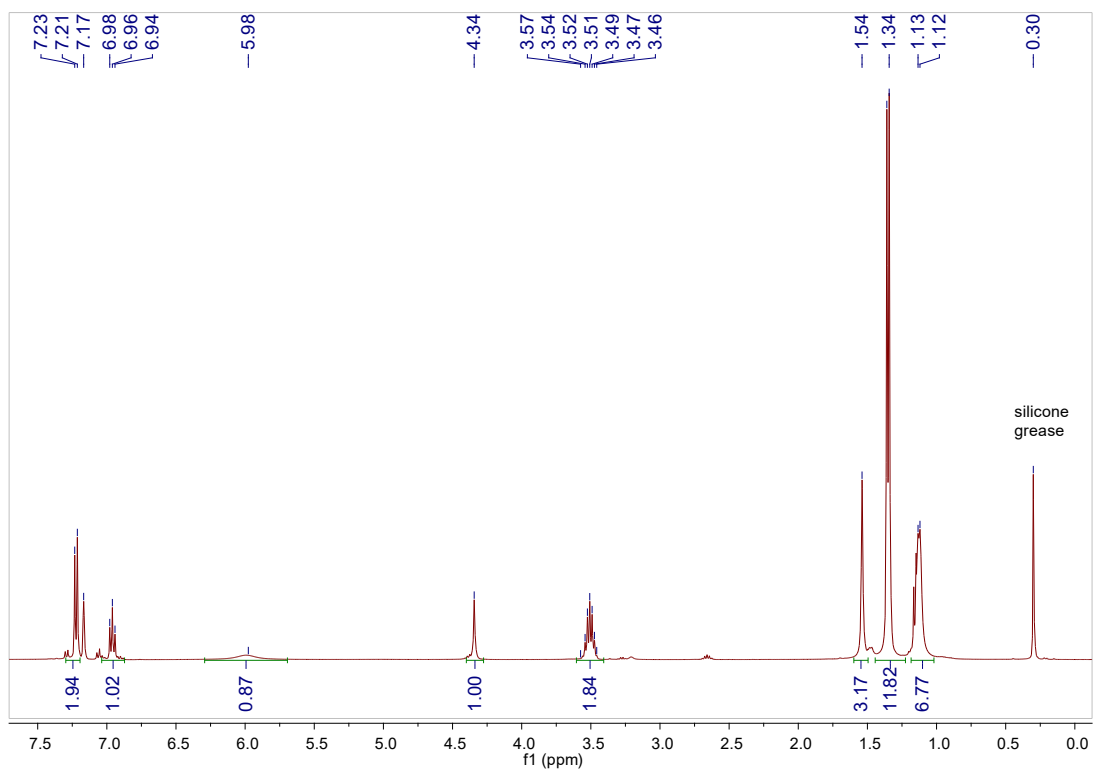

Fig. S 1  $^1\text{H}$  NMR spectrum of 1.

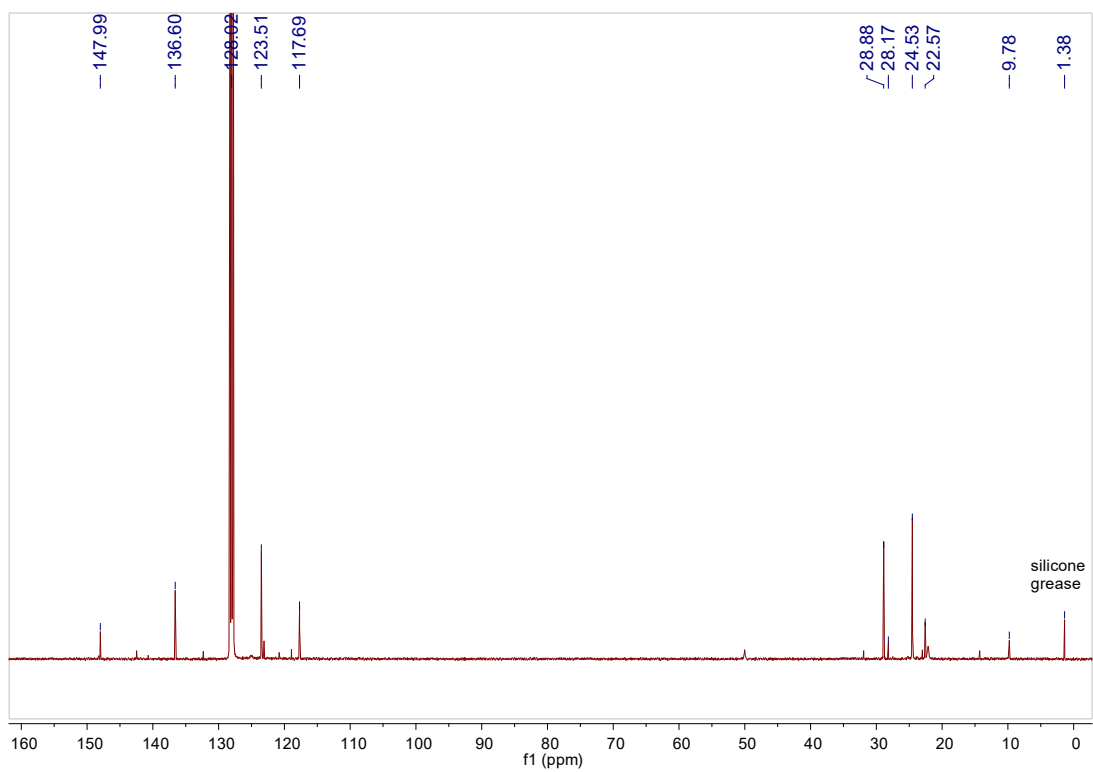

Fig. S 2  $^{13}\text{C}\{^1\text{H}\}$  NMR spectrum of 1.

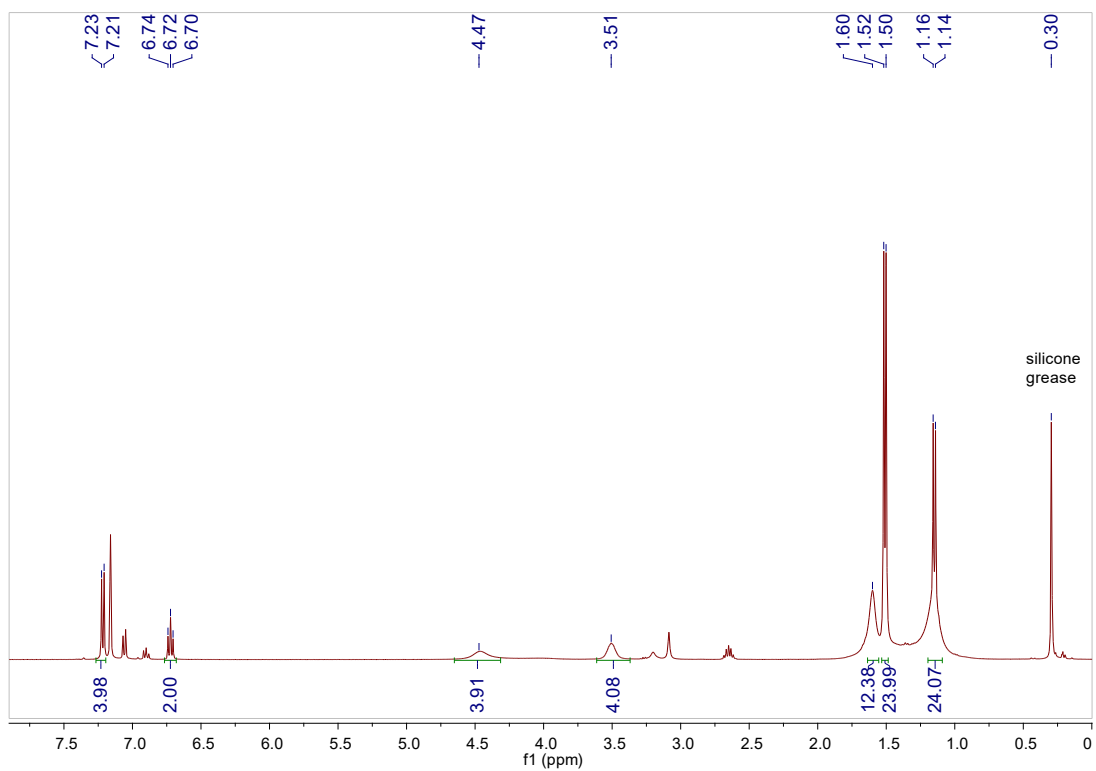

Fig. S 3  $^1\text{H}$  NMR spectrum of 2.

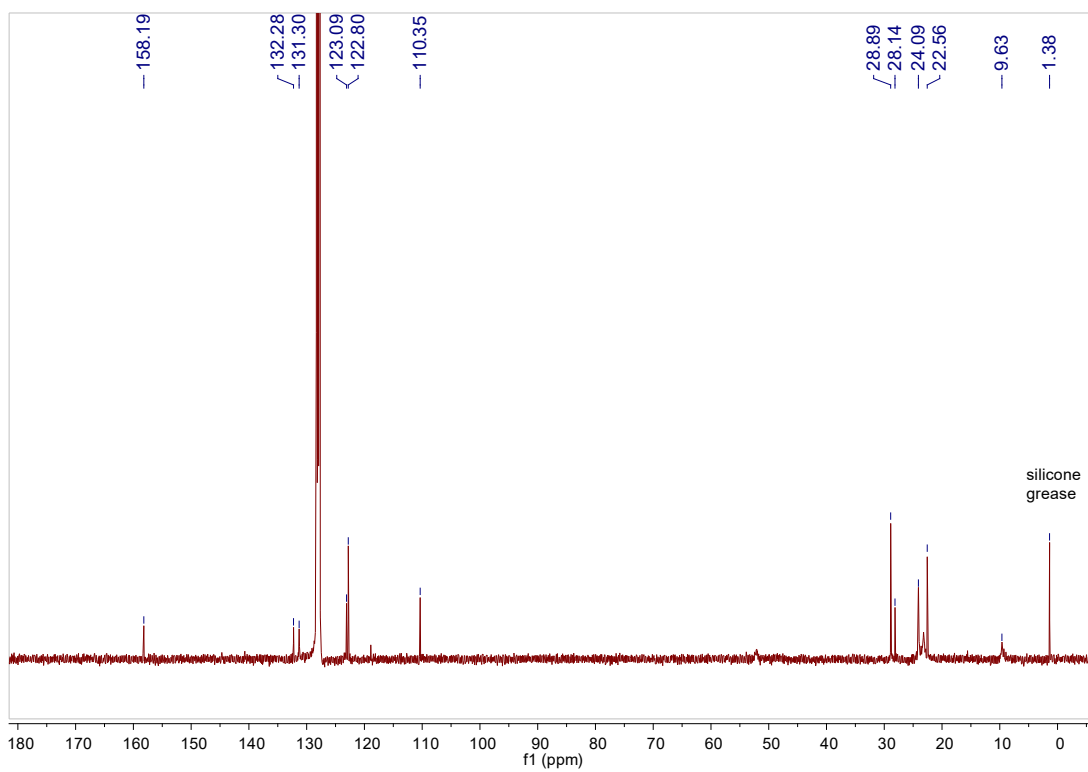

Fig. S 4  $^{13}\text{C}\{^1\text{H}\}$  NMR spectrum of 2.

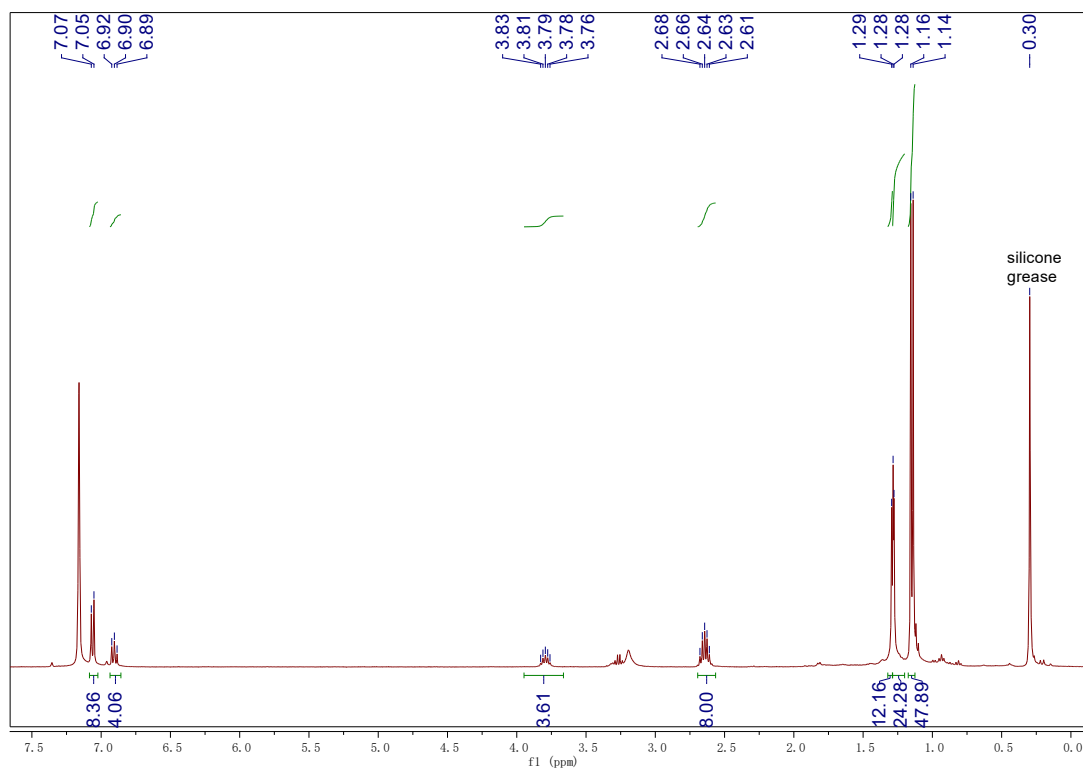

Fig. S 5  $^1\text{H}$  NMR spectrum of 3.

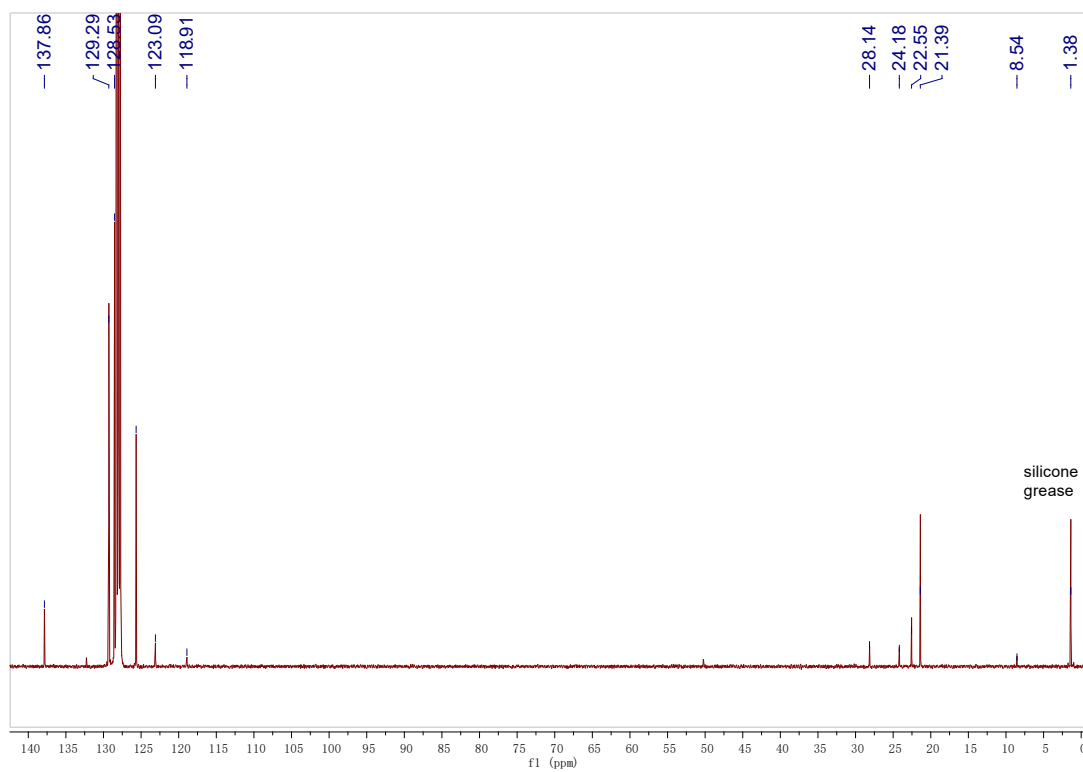

Fig. S 6  $^{13}\text{C}\{^1\text{H}\}$  NMR spectrum of 3.



Natural atomic orbital (NAO) analysis (Fig. S7) suggested the contribution of atoms to HOMO (left) and LUMO (right) and LUMO (right).

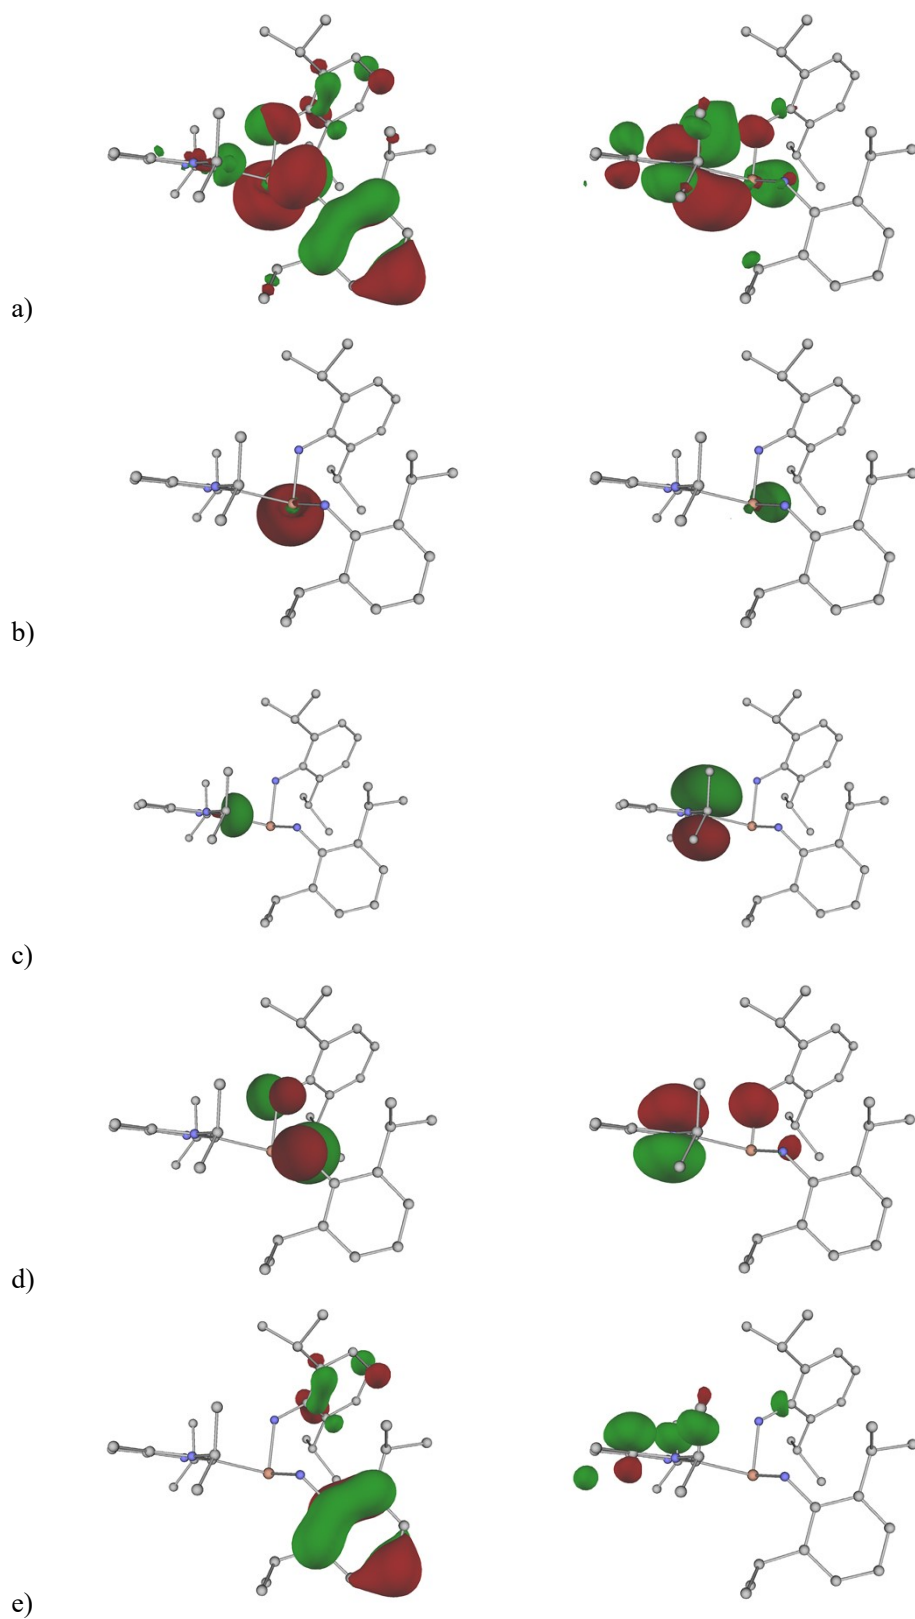

**Fig. S 7 Contribution of atoms to HOMO (left) and LUMO (right) of 1' by NAO analysis. Ge (b), carbene C (c), N (d) and other C (e)**

Note:

**For HOMO**

| NAO#      | Center       | Label     | Type            | Composition     |
|-----------|--------------|-----------|-----------------|-----------------|
| <b>4</b>  | <b>1(Ge)</b> | <b>s</b>  | <b>Val( 4s)</b> | <b>9.419 %</b>  |
| <b>19</b> | <b>1(Ge)</b> | <b>pz</b> | <b>Val( 4p)</b> | <b>9.530 %</b>  |
| 52        | 2(N )        | px        | Val( 2p)        | 1.713 %         |
| 54        | 2(N )        | py        | Val( 2p)        | 3.154 %         |
| 56        | 2(N )        | pz        | Val( 2p)        | 3.663 %         |
| 71        | 4(N )        | px        | Val( 2p)        | 3.244 %         |
| 73        | 4(N )        | py        | Val( 2p)        | 7.113 %         |
| <b>75</b> | <b>4(N )</b> | <b>pz</b> | <b>Val( 2p)</b> | <b>15.163 %</b> |
| 120       | 8(C )        | py        | Val( 2p)        | 0.612 %         |
| 134       | 9(C )        | py        | Val( 2p)        | 1.469 %         |
| 167       | 12(C )       | py        | Val( 2p)        | 2.094 %         |
| 205       | 16(C )       | py        | Val( 2p)        | 1.618 %         |
| 373       | 37(C )       | py        | Val( 2p)        | 1.454 %         |
| 375       | 37(C )       | pz        | Val( 2p)        | 5.406 %         |
| 387       | 38(C )       | py        | Val( 2p)        | 1.080 %         |
| 389       | 38(C )       | pz        | Val( 2p)        | 2.893 %         |
| 401       | 39(C )       | py        | Val( 2p)        | 1.339 %         |
| 403       | 39(C )       | pz        | Val( 2p)        | 5.885 %         |
| 417       | 40(C )       | pz        | Val( 2p)        | 0.604 %         |
| 432       | 42(C )       | px        | Val( 2p)        | 0.516 %         |
| 434       | 42(C )       | py        | Val( 2p)        | 2.344 %         |
| 436       | 42(C )       | pz        | Val( 2p)        | 7.215 %         |
| 862       | 96(C )       | s         | Val( 2s)        | 0.867 %         |
| 864       | 96(C )       | px        | Val( 2p)        | 1.721 %         |

Core composition: 0.075 %

Valence composition: 98.911 %

Rydberg composition: 1.007 %

**For LUMO**

| NAO#       | Center        | Label     | Type            | Composition     |
|------------|---------------|-----------|-----------------|-----------------|
| 4          | 1(Ge)         | s         | Val( 4s)        | 0.966 %         |
| <b>9</b>   | <b>1(Ge)</b>  | <b>px</b> | <b>Val( 4p)</b> | <b>6.482 %</b>  |
| <b>14</b>  | <b>1(Ge)</b>  | <b>py</b> | <b>Val( 4p)</b> | <b>2.739 %</b>  |
| 50         | 2(N )         | s         | Val( 2s)        | 2.120 %         |
| 63         | 3(H )         | s         | Val( 1s)        | 0.717 %         |
| 90         | 6(N )         | px        | Val( 2p)        | 0.721 %         |
| <b>92</b>  | <b>6(N )</b>  | <b>py</b> | <b>Val( 2p)</b> | <b>8.003 %</b>  |
| 94         | 6(N )         | pz        | Val( 2p)        | 4.215 %         |
| 104        | 7(N )         | px        | Val( 2p)        | 0.624 %         |
| <b>106</b> | <b>7(N )</b>  | <b>py</b> | <b>Val( 2p)</b> | <b>9.000 %</b>  |
| 108        | 7(N )         | pz        | Val( 2p)        | 3.126 %         |
| 655        | 70(C )        | py        | Val( 2p)        | 1.259 %         |
| 657        | 70(C )        | pz        | Val( 2p)        | 0.645 %         |
| 669        | 71(C )        | py        | Val( 2p)        | 1.613 %         |
| 671        | 71(C )        | pz        | Val( 2p)        | 0.707 %         |
| 864        | 96(C )        | px        | Val( 2p)        | 4.141 %         |
| <b>866</b> | <b>96(C )</b> | <b>py</b> | <b>Val( 2p)</b> | <b>25.654 %</b> |
| <b>868</b> | <b>96(C )</b> | <b>pz</b> | <b>Val( 2p)</b> | <b>11.930 %</b> |

Core composition: 0.022 %

Valence composition: 95.236 %

Rydberg composition: 4.735 %

The Wiberg bond order of the Ge(II)-C bond is 0.62 (Fig. S8). This bond is also described as an almost completely filled (1.96e) natural bond orbital (Fig. S8), which is strongly polarized towards the carbon atom (80.5%, Fig. S9), while the Ge(II) centre uses a hybrid orbital of high p character ( $sp^{7.81}$ ) for bonding to C ( $sp^{1.35}$ ). A lone pair (LP) of electrons (1.92e filled) on Ge(II) is found in a natural bond orbital of high s character ( $sp^{0.32}$ ), which can be visualized in the electron localization function (ELF) graph (Fig. S10).

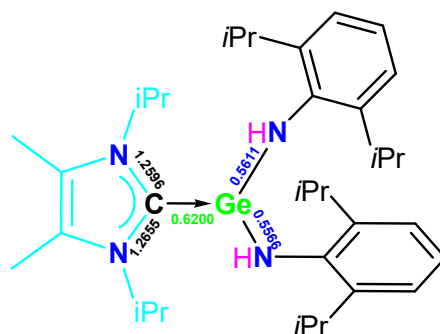

Fig. S 8 Selected Wiberg bond orders of 1'.

**Note:**

96,1

Contribution from NAO pairs that larger than printing threshold:

| Contri. | NAO | Center | NAO type    | NAO | Center | NAO type          |
|---------|-----|--------|-------------|-----|--------|-------------------|
| 0.1544  | 862 | 96(C ) | Val( 2s) s  | --- | 9      | 1(Ge) Val( 4p) px |
| 0.0680  | 862 | 96(C ) | Val( 2s) s  | --- | 19     | 1(Ge) Val( 4p) pz |
| 0.1578  | 864 | 96(C ) | Val( 2p) px | --- | 9      | 1(Ge) Val( 4p) px |
| 0.0960  | 864 | 96(C ) | Val( 2p) px | --- | 19     | 1(Ge) Val( 4p) pz |

Contribution from NAO shell pairs that larger than printing threshold:

| Contri. | Shell | Center | Type | Shell | Center | Type     |
|---------|-------|--------|------|-------|--------|----------|
| 0.2248  | 2     | 96(C ) | 2s   | ---   | 9      | 1(Ge) 4p |
| 0.0637  | 4     | 96(C ) | 2p   | ---   | 4      | 1(Ge) 4s |
| 0.3007  | 4     | 96(C ) | 2p   | ---   | 9      | 1(Ge) 4p |

Total Wiberg bond order: 0.6200

#####

2,1

Contribution from NAO pairs that larger than printing threshold:

| Contri. | NAO | Center | NAO type    | NAO | Center | NAO type          |
|---------|-----|--------|-------------|-----|--------|-------------------|
| 0.1337  | 50  | 2(N )  | Val( 2s) s  | --- | 14     | 1(Ge) Val( 4p) py |
| 0.0733  | 54  | 2(N )  | Val( 2p) py | --- | 14     | 1(Ge) Val( 4p) py |
| 0.0737  | 54  | 2(N )  | Val( 2p) py | --- | 19     | 1(Ge) Val( 4p) pz |
| 0.0836  | 56  | 2(N )  | Val( 2p) pz | --- | 14     | 1(Ge) Val( 4p) py |

Contribution from NAO shell pairs that larger than printing threshold:

| Contri. | Shell | Center | Type | Shell | Center | Type     |
|---------|-------|--------|------|-------|--------|----------|
| 0.1706  | 2     | 2(N )  | 2s   | ---   | 9      | 1(Ge) 4p |
| 0.0557  | 4     | 2(N )  | 2p   | ---   | 4      | 1(Ge) 4s |
| 0.3064  | 4     | 2(N )  | 2p   | ---   | 9      | 1(Ge) 4p |

Total Wiberg bond order: 0.5611

#####

4,1

Contribution from NAO pairs that larger than printing threshold:

| Contri. | NAO | Center | NAO type    | NAO | Center | NAO type          |
|---------|-----|--------|-------------|-----|--------|-------------------|
| 0.0983  | 69  | 4(N )  | Val( 2s) s  | --- | 19     | 1(Ge) Val( 4p) pz |
| 0.0561  | 71  | 4(N )  | Val( 2p) px | --- | 19     | 1(Ge) Val( 4p) pz |
| 0.0504  | 73  | 4(N )  | Val( 2p) py | --- | 19     | 1(Ge) Val( 4p) pz |
| 0.0522  | 75  | 4(N )  | Val( 2p) pz | --- | 9      | 1(Ge) Val( 4p) px |

Contribution from NAO shell pairs that larger than printing threshold:

| Contri. | Shell | Center | Type |     | Shell | Center | Type |
|---------|-------|--------|------|-----|-------|--------|------|
| 0.1541  | 2     | 4(N )  | 2s   | --- | 9     | 1(Ge)  | 4p   |
| 0.0536  | 4     | 4(N )  | 2p   | --- | 4     | 1(Ge)  | 4s   |
| 0.3205  | 4     | 4(N )  | 2p   | --- | 9     | 1(Ge)  | 4p   |

Total Wiberg bond order: 0.5566

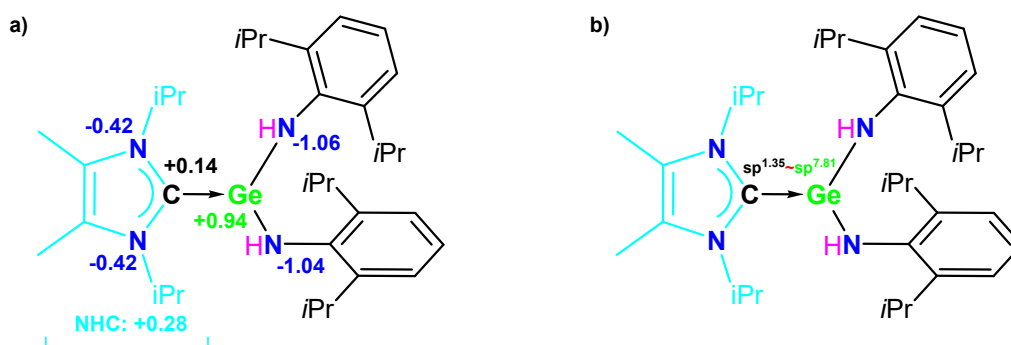

**Fig. S 9 Selected natural charges (a) and hybrids (b) of 1'.**

**Note1:**

Summary of Natural Population Analysis (selected):

| Natural Population |    |                 |           |           |         |           |
|--------------------|----|-----------------|-----------|-----------|---------|-----------|
| Atom               | No | Natural Charge  | Core      | Valence   | Rydberg | Total     |
| Ge                 | 1  | <b>0.94394</b>  | 27.99437  | 3.03112   | 0.03057 | 31.05606  |
| N                  | 2  | <b>-1.04146</b> | 1.99938   | 6.02833   | 0.01375 | 8.04146   |
| H                  | 3  | 0.38911         | 0.00000   | 0.60512   | 0.00577 | 0.61089   |
| N                  | 4  | <b>-1.06213</b> | 1.99942   | 6.04984   | 0.01287 | 8.06213   |
| H                  | 5  | 0.39872         | 0.00000   | 0.59479   | 0.00649 | 0.60128   |
| N                  | 6  | <b>-0.42333</b> | 1.99895   | 5.41215   | 0.01223 | 7.42333   |
| N                  | 7  | <b>-0.42192</b> | 1.99895   | 5.41024   | 0.01272 | 7.42192   |
| ...                |    |                 |           |           |         |           |
| C                  | 96 | <b>0.13554</b>  | 1.99916   | 3.81585   | 0.04946 | 5.86446   |
| =====              |    |                 |           |           |         |           |
| * Total *          |    | -0.00000        | 105.95710 | 219.23698 | 0.80592 | 326.00000 |

| Natural Population    |                              |
|-----------------------|------------------------------|
| Core                  | 105.95710 ( 99.9595% of 106) |
| Valence               | 219.23698 ( 99.6532% of 220) |
| Natural Minimal Basis | 325.19408 ( 99.7528% of 326) |
| Natural Rydberg Basis | 0.80592 ( 0.2472% of 326)    |

**Note2:**

| (Occupancy)    | Bond orbital/      | Coefficients/                             | Hybrids (selected) |
|----------------|--------------------|-------------------------------------------|--------------------|
| -----          |                    |                                           |                    |
| 1. (1.95689)   | BD ( 1)Ge 1 - C 96 |                                           |                    |
| ( 19.47%)      | 0.4412*Ge          | 1 s( 11.30%)p 7.81( 88.25%)d 0.04( 0.43%) | f 0.00( 0.02%)     |
| ( 80.53%)      | 0.8974* C 96       | s( 42.63%)p 1.35( 57.37%)d 0.00( 0.00%)   |                    |
| ...            |                    |                                           |                    |
| 158. (1.91546) | LP ( 1)Ge 1        | s( 75.89%)p 0.32( 24.05%)d 0.00( 0.06%)   | f 0.00( 0.00%)     |

To investigate the electron transfer between the NHC and  $[\text{ArN}(\text{H})_2]\text{Ge}$  fragments, a difference map of electron density was drawn by subtracting electron density of them in their isolated states from the whole system of  $\text{NHC} \rightarrow \text{Ge}[\text{N}(\text{H})\text{Ar}]_2$ . As shown in Fig. S11, it is noticeable that the electron density in the direction of the lone pair on Ge(II) centre was largely increased so as to strengthen the donor ability of the Ge(II) site.

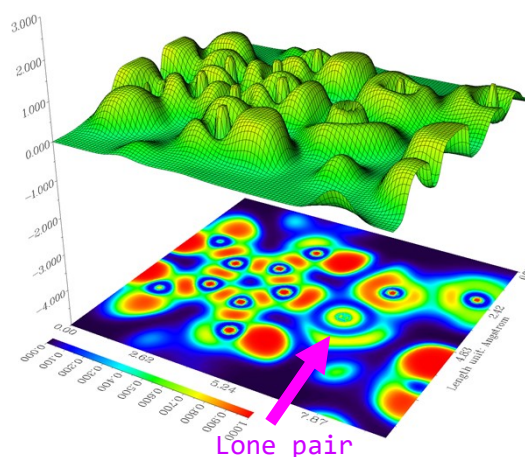

**Fig. S 10 Electron localization function (ELF) graph of 1'.**

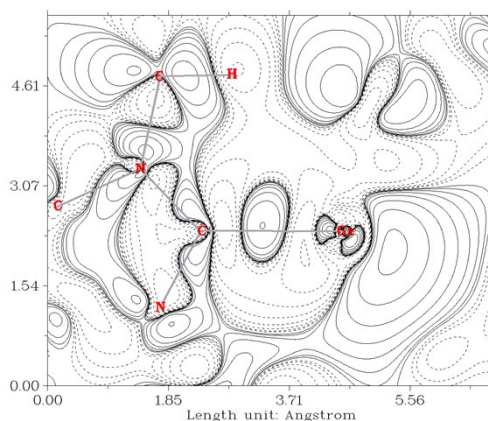

**Fig. S 11 The contour map of electron density difference of 1'.**

**Note1:** In the plane defined by atoms N, C, and Ge atoms. The solid and dashed contour lines exhibit where electron density is increased and decreased, respectively.

**Note2 (frag1 = NHC, frag2 =  $\text{Ge}[\text{N}(\text{H})\text{Ar}]_2$ ):**

```

===== Extended Charge decomposition analysis (ECDA) =====
Contribution to all occupied complex orbital:
Occupied, virtual orbitals of fragment 1:  4968.8840%      12.0533%
Occupied, virtual orbitals of fragment 2:  11282.8036%     36.2591%
Contribution to all virtual complex orbital:
Occupied, virtual orbitals of fragment 1:   31.1160%     23187.9467%
Occupied, virtual orbitals of fragment 2:   17.1965%     47863.7409%
PL( 1) + CT( 1-> 2) =  0.6223      PL( 1) + CT( 2-> 1) =  0.2411
PL( 2) + CT( 1-> 2) =  0.7252      PL( 2) + CT( 2-> 1) =  0.3439
The net electrons obtained by frag. 2 = CT( 1-> 2) - CT( 2-> 1) =  0.3813

```

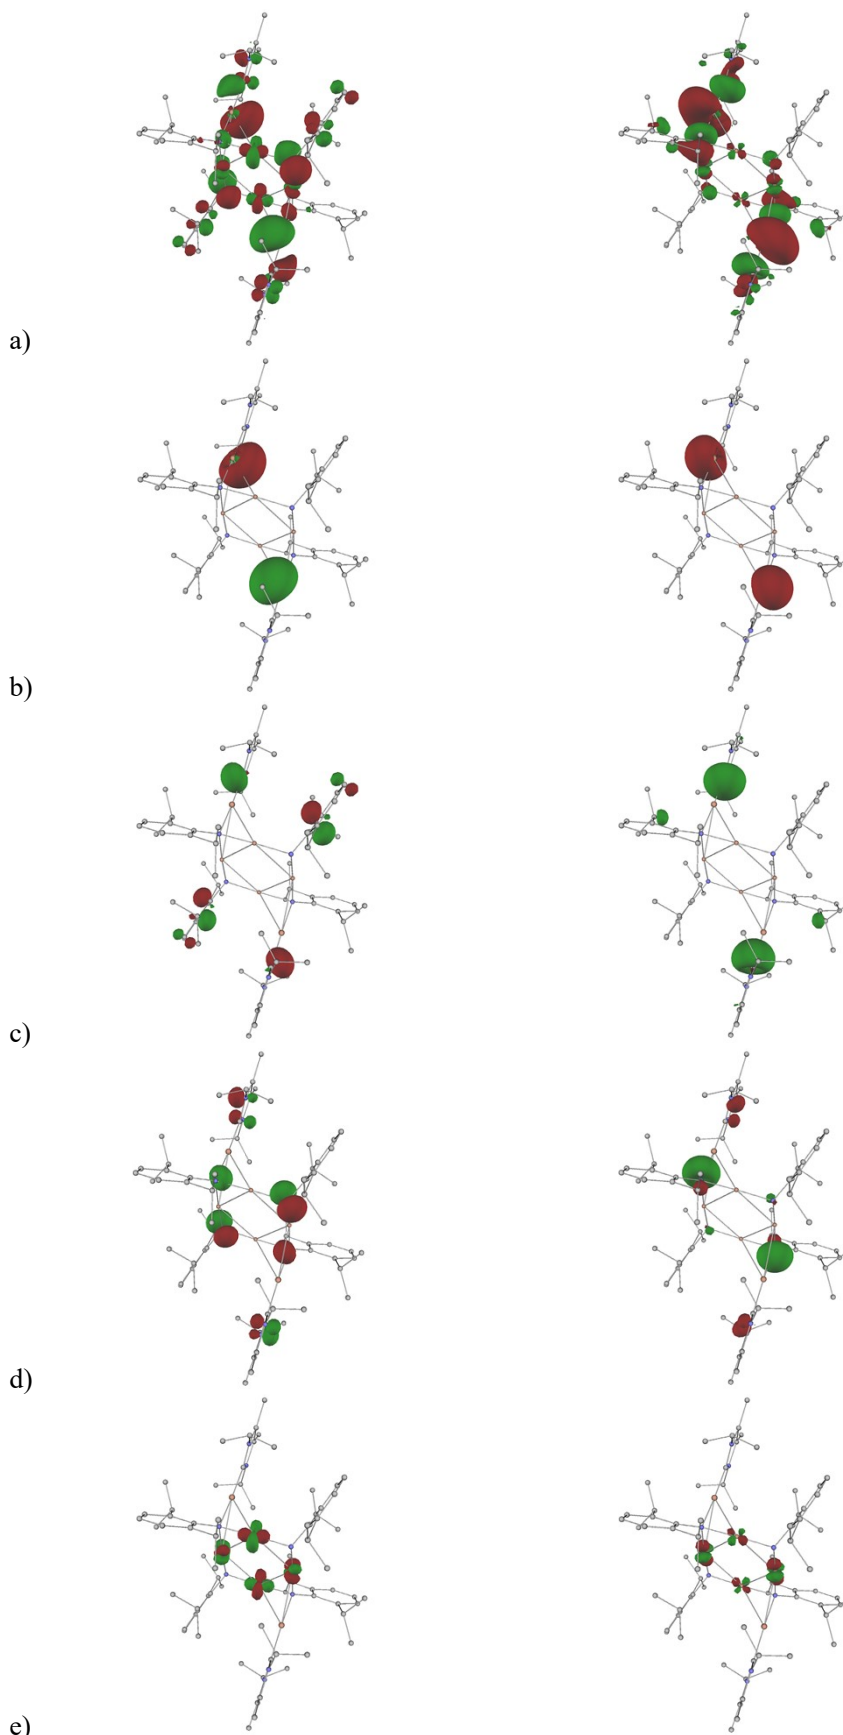

**Fig. S 12 Contribution of atoms to HOMO (left) and LUMO (right) of 3' by NAO analysis.**

Ge (b), C (c), N (d) and Cu (e)

Note: All Rydberg NAOs/shells or contributions  $\leq 0.50\%$  will not be printed

For HOMO

| NAO#       | Center        | Label     | Type            | Composition     |
|------------|---------------|-----------|-----------------|-----------------|
| <b>4</b>   | <b>1(Ge)</b>  | <b>s</b>  | <b>Val( 4s)</b> | <b>3.893 %</b>  |
| <b>9</b>   | <b>1(Ge)</b>  | <b>px</b> | <b>Val( 4p)</b> | <b>4.268 %</b>  |
| 14         | 1(Ge)         | py        | Val( 4p)        | 0.992 %         |
| <b>19</b>  | <b>1(Ge)</b>  | <b>pz</b> | <b>Val( 4p)</b> | <b>4.744 %</b>  |
| 50         | 2(N )         | s         | Val( 2s)        | 0.696 %         |
| 52         | 2(N )         | px        | Val( 2p)        | 0.506 %         |
| 64         | 3(C )         | s         | Val( 2s)        | 0.666 %         |
| 66         | 3(C )         | px        | Val( 2p)        | 2.399 %         |
| 94         | 5(N )         | px        | Val( 2p)        | 1.042 %         |
| 108        | 6(N )         | px        | Val( 2p)        | 1.295 %         |
| 632        | 65(Cu)        | dz2       | Val( 3d)        | 0.824 %         |
| 646        | 66(N )        | px        | Val( 2p)        | 0.667 %         |
| <b>648</b> | <b>66(N )</b> | <b>py</b> | <b>Val( 2p)</b> | <b>12.020 %</b> |
| 660        | 67(Cu)        | s         | Val( 4s)        | 0.630 %         |
| 675        | 67(Cu)        | dxy       | Val( 3d)        | 1.275 %         |
| 687        | 67(Cu)        | dx2y2     | Val( 3d)        | 1.963 %         |
| 705        | 68(Cu)        | s         | Val( 4s)        | 0.630 %         |
| 720        | 68(Cu)        | dxy       | Val( 3d)        | 1.275 %         |
| 732        | 68(Cu)        | dx2y2     | Val( 3d)        | 1.963 %         |
| 764        | 70(N )        | px        | Val( 2p)        | 0.667 %         |
| <b>766</b> | <b>70(N )</b> | <b>py</b> | <b>Val( 2p)</b> | <b>12.020 %</b> |
| 809        | 71(Cu)        | dz2       | Val( 3d)        | 0.824 %         |
| 823        | 72(C )        | px        | Val( 2p)        | 1.297 %         |
| 837        | 73(C )        | px        | Val( 2p)        | 0.832 %         |
| 921        | 79(C )        | px        | Val( 2p)        | 1.297 %         |
| 935        | 80(C )        | px        | Val( 2p)        | 0.832 %         |
| 954        | 82(C )        | px        | Val( 2p)        | 0.908 %         |
| 956        | 82(C )        | py        | Val( 2p)        | 0.760 %         |
| 1165       | 108(C )       | px        | Val( 2p)        | 0.908 %         |
| 1167       | 108(C )       | py        | Val( 2p)        | 0.760 %         |
| 1315       | 129(Ge)       | s         | Val( 4s)        | 3.893 %         |
| 1320       | 129(Ge)       | px        | Val( 4p)        | 4.268 %         |
| 1325       | 129(Ge)       | py        | Val( 4p)        | 0.992 %         |
| 1330       | 129(Ge)       | pz        | Val( 4p)        | 4.744 %         |
| 1361       | 130(N )       | s         | Val( 2s)        | 0.696 %         |
| 1363       | 130(N )       | px        | Val( 2p)        | 0.506 %         |
| 1389       | 132(C )       | s         | Val( 2s)        | 0.666 %         |
| 1391       | 132(C )       | px        | Val( 2p)        | 2.399 %         |
| 1433       | 135(N )       | px        | Val( 2p)        | 1.042 %         |
| 1447       | 136(N )       | px        | Val( 2p)        | 1.295 %         |

Core composition: 0.113 %

Valence composition: 98.250 %



Rydberg composition: 1.641 %

Orbital delocalization index: 8.41

For LUMO

| NAO# | Center  | Label | Type     | Composition |
|------|---------|-------|----------|-------------|
| 4    | 1(Ge)   | s     | Val( 4s) | 15.288 %    |
| 9    | 1(Ge)   | px    | Val( 4p) | 3.968 %     |
| 19   | 1(Ge)   | pz    | Val( 4p) | 0.654 %     |
| 50   | 2(N )   | s     | Val( 2s) | 1.659 %     |
| 54   | 2(N )   | py    | Val( 2p) | 7.442 %     |
| 64   | 3(C )   | s     | Val( 2s) | 3.176 %     |
| 68   | 3(C )   | py    | Val( 2p) | 3.857 %     |
| 624  | 65(Cu)  | dyz   | Val( 3d) | 1.284 %     |
| 648  | 66(N )  | py    | Val( 2p) | 0.771 %     |
| 650  | 66(N )  | pz    | Val( 2p) | 0.533 %     |
| 766  | 70(N )  | py    | Val( 2p) | 0.771 %     |
| 768  | 70(N )  | pz    | Val( 2p) | 0.533 %     |
| 801  | 71(Cu)  | dyz   | Val( 3d) | 1.284 %     |
| 1315 | 129(Ge) | s     | Val( 4s) | 15.288 %    |
| 1320 | 129(Ge) | px    | Val( 4p) | 3.968 %     |
| 1330 | 129(Ge) | pz    | Val( 4p) | 0.654 %     |
| 1361 | 130(N ) | s     | Val( 2s) | 1.659 %     |
| 1365 | 130(N ) | py    | Val( 2p) | 7.442 %     |
| 1389 | 132(C ) | s     | Val( 2s) | 3.176 %     |
| 1393 | 132(C ) | py    | Val( 2p) | 3.857 %     |

Core composition: 0.288 %

Valence composition: 96.751 %

Rydberg composition: 2.967 %

Orbital delocalization index: 12.01

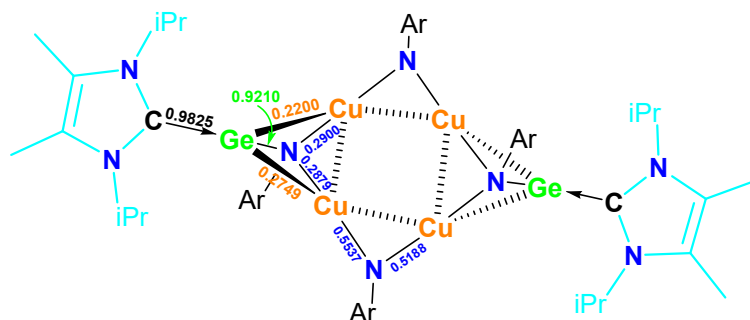

Fig. S 13 Selected Wiberg bond orders of 3'.

**Note:**

1,2

Contribution from NAO pairs that larger than printing threshold:

| Contri. | NAO | Center | NAO type    | NAO | Center | NAO type          |
|---------|-----|--------|-------------|-----|--------|-------------------|
| 0.2844  | 4   | 1(Ge)  | Val( 4s) s  | --- | 54     | 2(N ) Val( 2p) py |
| 0.0656  | 9   | 1(Ge)  | Val( 4p) px | --- | 50     | 2(N ) Val( 2s) s  |
| 0.1508  | 9   | 1(Ge)  | Val( 4p) px | --- | 54     | 2(N ) Val( 2p) py |
| 0.0601  | 14  | 1(Ge)  | Val( 4p) py | --- | 50     | 2(N ) Val( 2s) s  |
| 0.0541  | 14  | 1(Ge)  | Val( 4p) py | --- | 52     | 2(N ) Val( 2p) px |
| 0.1680  | 19  | 1(Ge)  | Val( 4p) pz | --- | 56     | 2(N ) Val( 2p) pz |

Contribution from NAO shell pairs that larger than printing threshold:

| Contri. | Shell | Center | Type   | Shell | Center | Type |
|---------|-------|--------|--------|-------|--------|------|
| 0.3127  | 4     | 1(Ge)  | 4s --- | 4     | 2(N )  | 2p   |
| 0.1282  | 9     | 1(Ge)  | 4p --- | 2     | 2(N )  | 2s   |
| 0.4554  | 9     | 1(Ge)  | 4p --- | 4     | 2(N )  | 2p   |

Total Wiberg bond order: 0.9210

#####

3,1

Contribution from NAO pairs that larger than printing threshold:

| Contri. | NAO | Center | NAO type    | NAO | Center | NAO type          |
|---------|-----|--------|-------------|-----|--------|-------------------|
| 0.0700  | 64  | 3(C )  | Val( 2s) s  | --- | 4      | 1(Ge) Val( 4s) s  |
| 0.1515  | 64  | 3(C )  | Val( 2s) s  | --- | 14     | 1(Ge) Val( 4p) py |
| 0.1498  | 66  | 3(C )  | Val( 2p) px | --- | 9      | 1(Ge) Val( 4p) px |
| 0.1605  | 66  | 3(C )  | Val( 2p) px | --- | 14     | 1(Ge) Val( 4p) py |
| 0.2030  | 68  | 3(C )  | Val( 2p) py | --- | 4      | 1(Ge) Val( 4s) s  |
| 0.0706  | 68  | 3(C )  | Val( 2p) py | --- | 9      | 1(Ge) Val( 4p) px |
| 0.0620  | 68  | 3(C )  | Val( 2p) py | --- | 14     | 1(Ge) Val( 4p) py |

Contribution from NAO shell pairs that larger than printing threshold:

| Contri. | Shell | Center | Type   | Shell | Center | Type |
|---------|-------|--------|--------|-------|--------|------|
| 0.0700  | 2     | 3(C )  | 2s --- | 4     | 1(Ge)  | 4s   |
| 0.1629  | 2     | 3(C )  | 2s --- | 9     | 1(Ge)  | 4p   |
| 0.2185  | 4     | 3(C )  | 2p --- | 4     | 1(Ge)  | 4s   |
| 0.5014  | 4     | 3(C )  | 2p --- | 9     | 1(Ge)  | 4p   |

Total Wiberg bond order: 0.9825

#####

1,65

Contribution from NAO pairs that larger than printing threshold:

| Contri. | NAO | Center | NAO type    | NAO | Center | NAO type            |
|---------|-----|--------|-------------|-----|--------|---------------------|
| 0.0523  | 19  | 1(Ge)  | Val( 4p) pz | --- | 632    | 65(Cu) Val( 3d) dz2 |

Contribution from NAO shell pairs that larger than printing threshold:

| Contri. | Shell | Center | Type   | Shell | Center | Type |
|---------|-------|--------|--------|-------|--------|------|
| 0.0978  | 9     | 1(Ge)  | 4p --- | 11    | 65(Cu) | 3d   |

Total Wiberg bond order: 0.2200

#####

1,67

Contribution from NAO pairs that larger than printing threshold:

| Contri. | NAO | Center | NAO type |  | NAO | Center | NAO type |
|---------|-----|--------|----------|--|-----|--------|----------|
|---------|-----|--------|----------|--|-----|--------|----------|

Contribution from NAO shell pairs that larger than printing threshold:

| Contri. | Shell | Center | Type |     | Shell | Center | Type |
|---------|-------|--------|------|-----|-------|--------|------|
| 0.0514  | 9     | 1(Ge)  | 4p   | --- | 4     | 67(Cu) | 4s   |
| 0.0651  | 9     | 1(Ge)  | 4p   | --- | 9     | 67(Cu) | 4p   |
| 0.0869  | 9     | 1(Ge)  | 4p   | --- | 11    | 67(Cu) | 3d   |

Total Wiberg bond order: 0.2749

#####

2,65

Contribution from NAO pairs that larger than printing threshold:

| Contri. | NAO | Center | NAO type    |     | NAO | Center | NAO type   |
|---------|-----|--------|-------------|-----|-----|--------|------------|
| 0.0600  | 56  | 2(N )  | Val( 2p) pz | --- | 601 | 65(Cu) | Val( 4s) s |

Contribution from NAO shell pairs that larger than printing threshold:

| Contri. | Shell | Center | Type |     | Shell | Center | Type |
|---------|-------|--------|------|-----|-------|--------|------|
| 0.0714  | 4     | 2(N )  | 2p   | --- | 4     | 65(Cu) | 4s   |
| 0.0643  | 4     | 2(N )  | 2p   | --- | 9     | 65(Cu) | 4p   |
| 0.0533  | 4     | 2(N )  | 2p   | --- | 11    | 65(Cu) | 3d   |

Total Wiberg bond order: 0.2900

#####

2,67

Contribution from NAO pairs that larger than printing threshold:

| Contri. | NAO | Center | NAO type |  | NAO | Center | NAO type |
|---------|-----|--------|----------|--|-----|--------|----------|
|---------|-----|--------|----------|--|-----|--------|----------|

Contribution from NAO shell pairs that larger than printing threshold:

| Contri. | Shell | Center | Type |     | Shell | Center | Type |
|---------|-------|--------|------|-----|-------|--------|------|
| 0.0566  | 2     | 2(N )  | 2s   | --- | 9     | 67(Cu) | 4p   |
| 0.0653  | 4     | 2(N )  | 2p   | --- | 4     | 67(Cu) | 4s   |
| 0.0716  | 4     | 2(N )  | 2p   | --- | 9     | 67(Cu) | 4p   |

Total Wiberg bond order: 0.2879

#####

66,65

Contribution from NAO pairs that larger than printing threshold:

| Contri. | NAO | Center | NAO type    |     | NAO | Center | NAO type    |
|---------|-----|--------|-------------|-----|-----|--------|-------------|
| 0.0754  | 644 | 66(N ) | Val( 2s) s  | --- | 601 | 65(Cu) | Val( 4s) s  |
| 0.0584  | 644 | 66(N ) | Val( 2s) s  | --- | 614 | 65(Cu) | Val( 4p) pz |
| 0.0665  | 648 | 66(N ) | Val( 2p) py | --- | 610 | 65(Cu) | Val( 4p) py |
| 0.1810  | 650 | 66(N ) | Val( 2p) pz | --- | 601 | 65(Cu) | Val( 4s) s  |

Contribution from NAO shell pairs that larger than printing threshold:

| Contri. | Shell | Center | Type |     | Shell | Center | Type |
|---------|-------|--------|------|-----|-------|--------|------|
| 0.0754  | 2     | 66(N ) | 2s   | --- | 4     | 65(Cu) | 4s   |
| 0.0608  | 2     | 66(N ) | 2s   | --- | 9     | 65(Cu) | 4p   |
| 0.1886  | 4     | 66(N ) | 2p   | --- | 4     | 65(Cu) | 4s   |
| 0.1555  | 4     | 66(N ) | 2p   | --- | 9     | 65(Cu) | 4p   |

Total Wiberg bond order: 0.5537

#####

66,68

Contribution from NAO pairs that larger than printing threshold:

| Contri. | NAO | Center | NAO type    |     | NAO | Center | NAO type   |
|---------|-----|--------|-------------|-----|-----|--------|------------|
| 0.0650  | 644 | 66(N ) | Val( 2s) s  | --- | 705 | 68(Cu) | Val( 4s) s |
| 0.1434  | 646 | 66(N ) | Val( 2p) px | --- | 705 | 68(Cu) | Val( 4s) s |

Contribution from NAO shell pairs that larger than printing threshold:

| Contri. | Shell | Center | Type |     | Shell | Center | Type |
|---------|-------|--------|------|-----|-------|--------|------|
| 0.0650  | 2     | 66(N ) | 2s   | --- | 4     | 68(Cu) | 4s   |
| 0.0589  | 2     | 66(N ) | 2s   | --- | 9     | 68(Cu) | 4p   |
| 0.1782  | 4     | 66(N ) | 2p   | --- | 4     | 68(Cu) | 4s   |
| 0.1482  | 4     | 66(N ) | 2p   | --- | 9     | 68(Cu) | 4p   |

Total Wiberg bond order: 0.5188

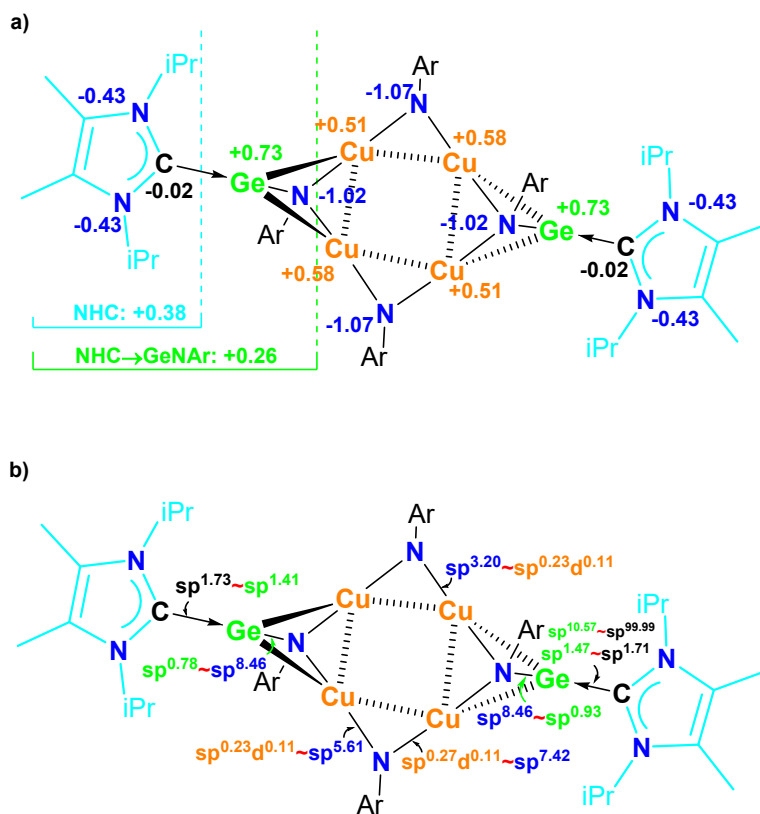

Fig. S 14 Selected natural charges (a) and hybrids (b) of 3'.

**Note1:**

Summary of Natural Population Analysis (selected):

| Natural Population |     |                |           |           |         |           |
|--------------------|-----|----------------|-----------|-----------|---------|-----------|
| Atom               | No  | Natural Charge | Core      | Valence   | Rydberg | Total     |
| Ge                 | 1   | 0.73341        | 27.98924  | 3.23764   | 0.03972 | 31.26659  |
| N                  | 2   | -1.02068       | 1.99941   | 6.00526   | 0.01600 | 8.02068   |
| C                  | 3   | -0.02001       | 1.99852   | 3.97241   | 0.04908 | 6.02001   |
| N                  | 5   | -0.42925       | 1.99891   | 5.41505   | 0.01529 | 7.42925   |
| N                  | 6   | -0.43128       | 1.99890   | 5.41767   | 0.01471 | 7.43128   |
| Cu                 | 65  | 0.57658        | 17.99279  | 10.41343  | 0.01719 | 28.42342  |
| N                  | 66  | -1.07389       | 1.99948   | 6.05931   | 0.01510 | 8.07389   |
| Cu                 | 67  | 0.50540        | 17.99229  | 10.48479  | 0.01751 | 28.49460  |
| Cu                 | 68  | 0.50540        | 17.99229  | 10.48479  | 0.01751 | 28.49460  |
| N                  | 70  | -1.07389       | 1.99948   | 6.05931   | 0.01510 | 8.07389   |
| Cu                 | 71  | 0.57658        | 17.99279  | 10.41343  | 0.01719 | 28.42342  |
| Ge                 | 129 | 0.73341        | 27.98924  | 3.23764   | 0.03972 | 31.26659  |
| N                  | 130 | -1.02068       | 1.99941   | 6.00526   | 0.01600 | 8.02068   |
| C                  | 132 | -0.02001       | 1.99852   | 3.97241   | 0.04908 | 6.02001   |
| N                  | 135 | -0.42925       | 1.99891   | 5.41505   | 0.01529 | 7.42925   |
| N                  | 136 | -0.43128       | 1.99890   | 5.41767   | 0.01471 | 7.43128   |
| =====              |     |                |           |           |         |           |
| * Total *          |     | -0.00000       | 283.86916 | 478.34303 | 1.78781 | 764.00000 |

| Natural Population    |                              |
|-----------------------|------------------------------|
| Core                  | 283.86916 ( 99.9539% of 284) |
| Valence               | 478.34303 ( 99.6548% of 480) |
| Natural Minimal Basis | 762.21219 ( 99.7660% of 764) |
| Natural Rydberg Basis | 1.78781 ( 0.2340% of 764)    |

**Note2:**

(Occupancy) Bond orbital/ Coefficients/ Hybrids (selected)

1. (1.88578) BD ( 1)Ge 1 - N 2  
 ( 30.20%) 0.5496\*Ge 1 s( 55.98%)p 0.78( 43.68%)d 0.00( 0.19%)  
 f 0.00( 0.15%)  
 ( 69.80%) 0.8354\* N 2 s( 10.57%)p 8.46( 89.41%)d 0.00( 0.02%)

2. (1.92629) BD ( 1)Ge 1 - C 3  
 ( 28.13%) 0.5304\*Ge 1 s( 41.41%)p 1.41( 58.29%)d 0.00( 0.17%)  
 f 0.00( 0.13%)  
 ( 71.87%) 0.8478\* C 3 s( 36.61%)p 1.73( 63.39%)d 0.00( 0.00%)

71. (1.84425) BD ( 1)Cu 65 - N 66  
 ( 14.30%) 0.3781\*Cu 65 s( 74.56%)p 0.23( 16.97%)d 0.11( 8.46%)  
 f 0.00( 0.00%)  
 ( 85.70%) 0.9258\* N 66 s( 15.12%)p 5.61( 84.87%)d 0.00( 0.01%)

72. (1.76083) BD ( 1) N 66 -Cu 68  
 ( 85.39%) 0.9241\* N 66 s( 11.87%)p 7.42( 88.11%)d 0.00( 0.02%)  
 ( 14.61%) 0.3822\*Cu 68 s( 72.36%)p 0.27( 19.59%)d 0.11( 8.05%)  
 f 0.00( 0.00%)

76. (1.81386) BD ( 1) N 70 -Cu 71  
 ( 85.72%) 0.9258\* N 70 s( 23.83%)p 3.20( 76.17%)d 0.00( 0.01%)  
 ( 14.28%) 0.3779\*Cu 71 s( 74.56%)p 0.23( 16.97%)d 0.11( 8.46%)  
 f 0.00( 0.00%)

139. (1.88816) BD ( 1)Ge 129 - N 130  
 ( 29.32%) 0.5415\*Ge 129 s( 51.69%)p 0.93( 47.95%)d 0.00( 0.20%)  
 f 0.00( 0.16%)  
 ( 70.68%) 0.8407\* N 130 s( 10.57%)p 8.46( 89.41%)d 0.00( 0.02%)

140. (1.91900) BD ( 1)Ge 129 - C 132  
 ( 28.32%) 0.5321\*Ge 129 s( 40.32%)p 1.47( 59.38%)d 0.00( 0.17%)  
 f 0.00( 0.13%)  
 ( 71.68%) 0.8467\* C 132 s( 36.86%)p 1.71( 63.13%)d 0.00( 0.00%)

141. (1.83894) BD ( 2)Ge 129 - C 132  
 ( 62.69%) 0.7917\*Ge 129 s( 8.60%)p10.57( 90.96%)d 0.04( 0.34%)  
 f 0.01( 0.09%)  
 ( 37.31%) 0.6109\* C 132 s( 0.13%)p99.99( 99.83%)d 0.26( 0.04%)

351. (1.33233) LP ( 1)Ge 1 s( 3.22%)p29.91( 96.41%)d 0.09( 0.29%)  
 f 0.03( 0.09%)

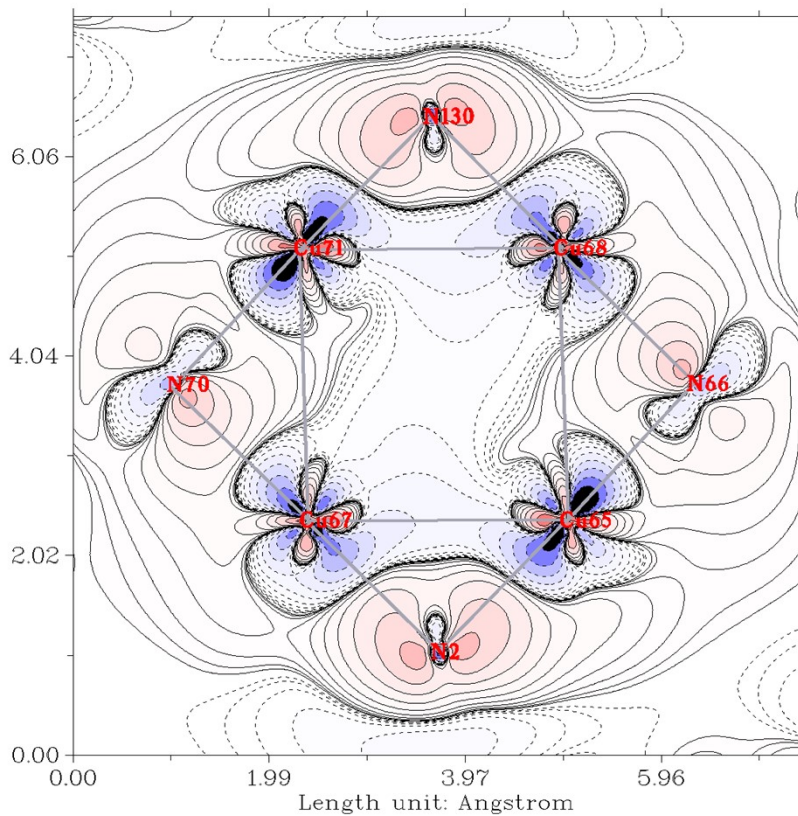

a)

Cu<sub>4</sub> planeaaa

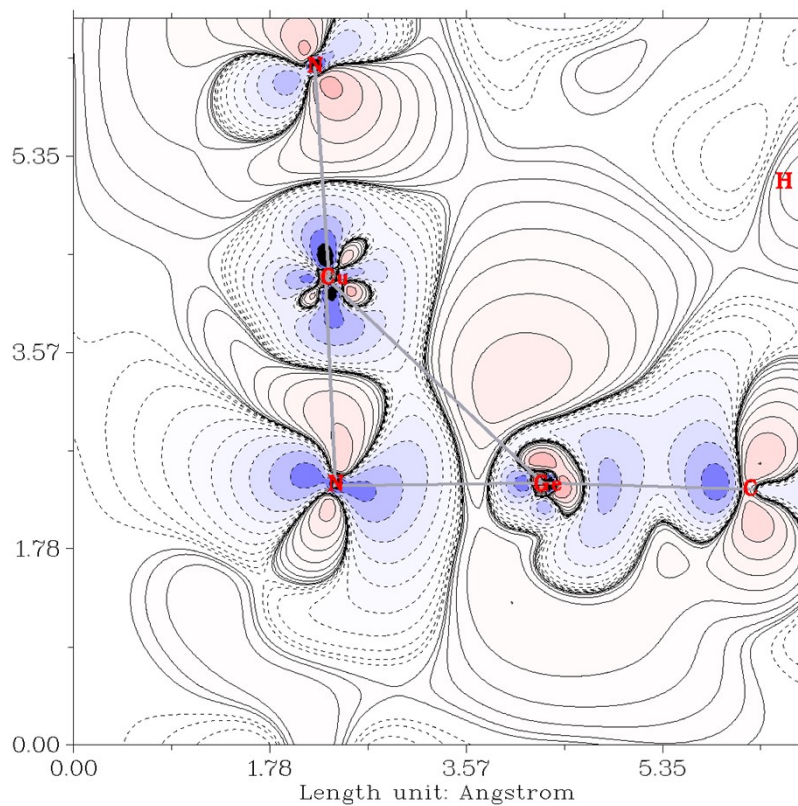

b)

GeNCu plane

**Fig. S 15 The contour map of electron density difference of 3'.**

**Note1:** In the plane defined by atoms N, C, and Ge atoms. The solid and dashed contour lines exhibit where electron density is increased and decreased, respectively.

**Note2 (frag1 = NHC, frag2 = GeN(Ar)[Cu<sub>2</sub>NAr]<sub>2</sub>GeN(Ar)←NHC):**

===== Extended Charge decomposition analysis (ECDA) =====

Contribution to all occupied complex orbital:

Occupied, virtual orbitals of fragment 1: 4939.4927% 25.9809%

Occupied, virtual orbitals of fragment 2: 33138.9190% 95.6075%

Contribution to all virtual complex orbital:

Occupied, virtual orbitals of fragment 1: 60.5073% 23174.0192%

Occupied, virtual orbitals of fragment 2: 61.0810% 129304.3926%

PL( 1) + CT( 1-> 2) = 1.2101 PL( 1) + CT( 2-> 1) = 0.5196

PL( 2) + CT( 1-> 2) = 1.9121 PL( 2) + CT( 2-> 1) = 1.2216

The net electrons obtained by frag. 2 = CT( 1-> 2) - CT( 2-> 1) = 0.6905

**Note3 (frag1 = NHC→GeNAr, frag2 = [Cu<sub>2</sub>NAr]<sub>2</sub>GeN(Ar)←NHC):**

===== Extended Charge decomposition analysis (ECDA) =====

Contribution to all occupied complex orbital:

Occupied, virtual orbitals of fragment 1: 11350.6334% 31.8016%

Occupied, virtual orbitals of fragment 2: 26753.9771% 63.5879%

Contribution to all virtual complex orbital:

Occupied, virtual orbitals of fragment 1: 49.3666% 48268.1983%

Occupied, virtual orbitals of fragment 2: 46.0229% 104236.4121%

PL( 1) + CT( 1-> 2) = 0.9873 PL( 1) + CT( 2-> 1) = 0.6360

PL( 2) + CT( 1-> 2) = 1.2718 PL( 2) + CT( 2-> 1) = 0.9205

The net electrons obtained by frag. 2 = CT( 1-> 2) - CT( 2-> 1) = 0.3513



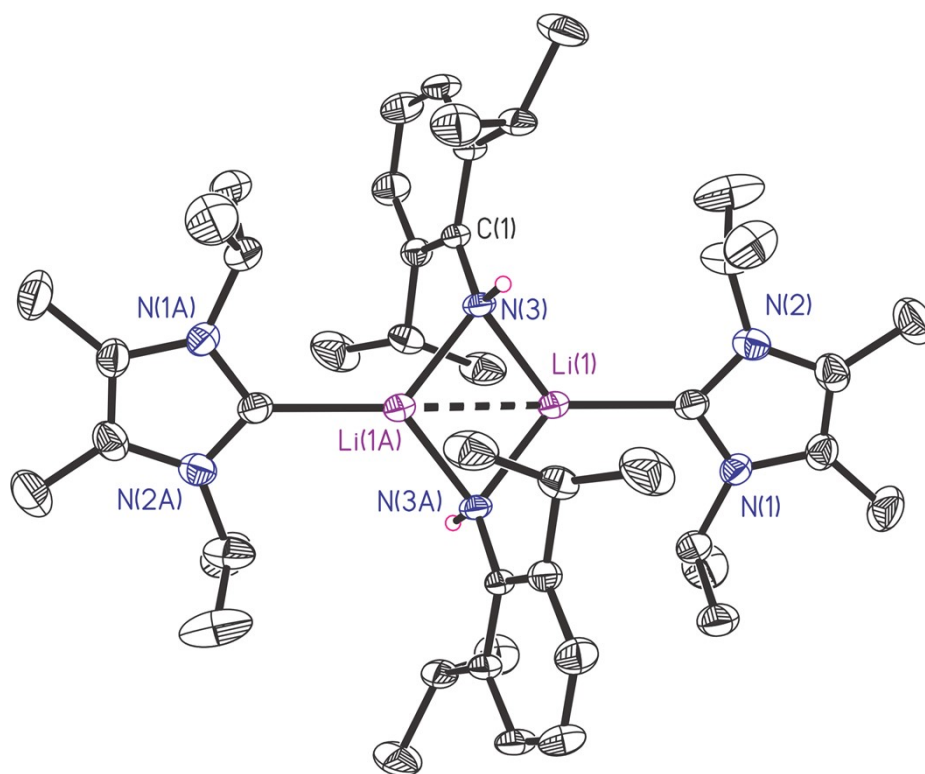

**Fig. S 16 Molecular structure of  $[\text{NHC} \rightarrow \text{LiN}(\text{H})\text{Ar}]_2$  (2).**  
 Ellipsoids are drawn at 30% probability. H atoms except for NH groups have been omitted for clarity.

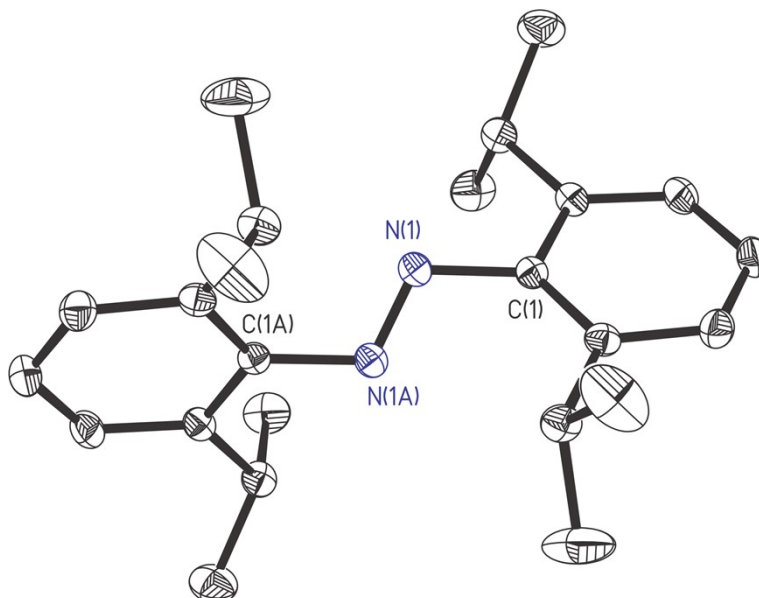

**Fig. S 17 Molecular structure of  $\text{ArNNAr}$  (4).**  
 Ellipsoids are drawn at 30% probability.

**Table S 1 Optimized geometry of 1'**

Standard orientation:

| Center Number | Atomic Number | Atomic Type | Coordinates (Angstroms) |           |           |
|---------------|---------------|-------------|-------------------------|-----------|-----------|
|               |               |             | X                       | Y         | Z         |
| 1             | 32            | 0           | 0.315021                | 0.113640  | -0.896819 |
| 2             | 7             | 0           | -0.200752               | -1.602202 | -0.117910 |
| 3             | 1             | 0           | 0.286571                | -1.748409 | 0.756356  |
| 4             | 7             | 0           | -0.533347               | 1.251357  | 0.434763  |
| 5             | 1             | 0           | -1.030808               | 0.656304  | 1.089649  |
| 6             | 7             | 0           | 3.162078                | -0.899863 | -0.655280 |
| 7             | 7             | 0           | 2.876591                | 0.356598  | 1.074474  |
| 8             | 6             | 0           | -1.489683               | -2.127066 | -0.050422 |
| 9             | 6             | 0           | -2.013212               | -2.583626 | 1.199361  |
| 10            | 6             | 0           | -3.311883               | -3.090875 | 1.259374  |
| 11            | 1             | 0           | -3.708254               | -3.434490 | 2.217082  |
| 12            | 6             | 0           | -4.121250               | -3.161060 | 0.129557  |
| 13            | 1             | 0           | -5.140392               | -3.548038 | 0.198703  |
| 14            | 6             | 0           | -3.601379               | -2.742917 | -1.088886 |
| 15            | 1             | 0           | -4.221215               | -2.817657 | -1.987136 |
| 16            | 6             | 0           | -2.301633               | -2.244736 | -1.210640 |
| 17            | 6             | 0           | -1.789161               | -1.890166 | -2.596317 |
| 18            | 1             | 0           | -0.727797               | -1.615716 | -2.496971 |
| 19            | 6             | 0           | -1.845733               | -3.090413 | -3.544446 |
| 20            | 1             | 0           | -1.300455               | -3.952242 | -3.129688 |
| 21            | 1             | 0           | -1.398094               | -2.836720 | -4.519265 |
| 22            | 1             | 0           | -2.881537               | -3.414407 | -3.734515 |
| 23            | 6             | 0           | -2.514994               | -0.680786 | -3.186816 |
| 24            | 1             | 0           | -3.589004               | -0.887511 | -3.323796 |
| 25            | 1             | 0           | -2.096311               | -0.411895 | -4.170073 |
| 26            | 1             | 0           | -2.425117               | 0.201301  | -2.533959 |
| 27            | 6             | 0           | -1.143448               | -2.555696 | 2.446049  |
| 28            | 1             | 0           | -0.563485               | -1.612951 | 2.417687  |
| 29            | 6             | 0           | -1.917292               | -2.532420 | 3.760897  |
| 30            | 1             | 0           | -2.659808               | -1.720949 | 3.781944  |
| 31            | 1             | 0           | -1.226683               | -2.384291 | 4.605892  |
| 32            | 1             | 0           | -2.446552               | -3.481160 | 3.941756  |
| 33            | 6             | 0           | -0.142978               | -3.719466 | 2.446030  |
| 34            | 1             | 0           | 0.553149                | -3.652167 | 3.298534  |
| 35            | 1             | 0           | 0.450722                | -3.756150 | 1.519614  |
| 36            | 1             | 0           | -0.681139               | -4.677452 | 2.522486  |
| 37            | 6             | 0           | -2.722097               | 2.358180  | 0.359209  |
| 38            | 6             | 0           | -1.331129               | 2.331868  | 0.042569  |
| 39            | 6             | 0           | -0.769170               | 3.420863  | -0.674151 |
| 40            | 6             | 0           | -1.594083               | 4.479736  | -1.066020 |
| 41            | 1             | 0           | -1.155385               | 5.313304  | -1.622490 |
| 42            | 6             | 0           | -2.947348               | 4.508801  | -0.758266 |
| 43            | 1             | 0           | -3.572716               | 5.347328  | -1.073431 |
| 44            | 6             | 0           | -3.494231               | 3.448929  | -0.040201 |
| 45            | 1             | 0           | -4.558742               | 3.465433  | 0.202969  |
| 46            | 6             | 0           | -3.350242               | 1.222333  | 1.150017  |
| 47            | 1             | 0           | -2.862453               | 0.283738  | 0.830600  |

|    |   |   |           |           |           |
|----|---|---|-----------|-----------|-----------|
| 48 | 6 | 0 | -3.097066 | 1.398615  | 2.652471  |
| 49 | 1 | 0 | -2.024443 | 1.499489  | 2.882792  |
| 50 | 1 | 0 | -3.490675 | 0.543519  | 3.225631  |
| 51 | 1 | 0 | -3.593995 | 2.311308  | 3.018834  |
| 52 | 6 | 0 | -4.839402 | 1.020505  | 0.883849  |
| 53 | 1 | 0 | -5.449203 | 1.846501  | 1.284208  |
| 54 | 1 | 0 | -5.183980 | 0.093885  | 1.367801  |
| 55 | 1 | 0 | -5.046279 | 0.933324  | -0.193175 |
| 56 | 6 | 0 | 0.714979  | 3.509710  | -0.992232 |
| 57 | 1 | 0 | 1.202038  | 2.623965  | -0.553664 |
| 58 | 6 | 0 | 0.992475  | 3.486817  | -2.496143 |
| 59 | 1 | 0 | 0.585578  | 2.574488  | -2.956527 |
| 60 | 1 | 0 | 2.076462  | 3.518959  | -2.696592 |
| 61 | 1 | 0 | 0.536180  | 4.354612  | -2.999283 |
| 62 | 6 | 0 | 1.351947  | 4.739358  | -0.338299 |
| 63 | 1 | 0 | 0.942341  | 5.673185  | -0.754934 |
| 64 | 1 | 0 | 2.441609  | 4.756698  | -0.507547 |
| 65 | 1 | 0 | 1.169927  | 4.756856  | 0.746881  |
| 66 | 6 | 0 | 5.210987  | 0.337361  | 2.121207  |
| 67 | 1 | 0 | 4.828968  | 0.236566  | 3.146363  |
| 68 | 1 | 0 | 5.548757  | 1.377446  | 1.991967  |
| 69 | 1 | 0 | 6.095979  | -0.306607 | 2.035646  |
| 70 | 6 | 0 | 4.202798  | -0.056153 | 1.099651  |
| 71 | 6 | 0 | 4.382619  | -0.856477 | 0.002295  |
| 72 | 6 | 0 | 5.626452  | -1.545039 | -0.438161 |
| 73 | 1 | 0 | 5.440764  | -2.585723 | -0.737365 |
| 74 | 1 | 0 | 6.108244  | -1.034236 | -1.286573 |
| 75 | 1 | 0 | 6.351493  | -1.564806 | 0.385958  |
| 76 | 6 | 0 | 2.833207  | -1.658917 | -1.874159 |
| 77 | 1 | 0 | 1.838394  | -1.273216 | -2.154363 |
| 78 | 6 | 0 | 2.679093  | -3.144788 | -1.586730 |
| 79 | 1 | 0 | 3.617922  | -3.612175 | -1.252139 |
| 80 | 1 | 0 | 2.355566  | -3.662725 | -2.501848 |
| 81 | 1 | 0 | 1.903196  | -3.299265 | -0.823697 |
| 82 | 6 | 0 | 3.762534  | -1.339296 | -3.036753 |
| 83 | 1 | 0 | 3.879014  | -0.252493 | -3.160677 |
| 84 | 1 | 0 | 3.318125  | -1.734058 | -3.962086 |
| 85 | 1 | 0 | 4.757938  | -1.793218 | -2.935189 |
| 86 | 6 | 0 | 2.180332  | 1.170034  | 2.087125  |
| 87 | 1 | 0 | 1.201166  | 1.373956  | 1.620435  |
| 88 | 6 | 0 | 1.930741  | 0.376693  | 3.363475  |
| 89 | 1 | 0 | 1.414478  | -0.570160 | 3.146356  |
| 90 | 1 | 0 | 1.286114  | 0.962524  | 4.035785  |
| 91 | 1 | 0 | 2.855957  | 0.143894  | 3.912888  |
| 92 | 6 | 0 | 2.856775  | 2.510491  | 2.338069  |
| 93 | 1 | 0 | 3.770190  | 2.431453  | 2.944553  |
| 94 | 1 | 0 | 2.157992  | 3.160798  | 2.884451  |
| 95 | 1 | 0 | 3.102607  | 3.014864  | 1.392746  |
| 96 | 6 | 0 | 2.236545  | -0.165818 | 0.005156  |

---

**Table S 2 Optimized geometry of 3'**

Standard orientation:

| Center Number | Atomic Number | Atomic Type | Coordinates (Angstroms) |           |           |
|---------------|---------------|-------------|-------------------------|-----------|-----------|
|               |               |             | X                       | Y         | Z         |
| 1             | 32            | 0           | -0.759979               | 2.992280  | -1.667432 |
| 2             | 7             | 0           | -1.663012               | 1.346048  | -1.666165 |
| 3             | 6             | 0           | 0.105647                | 4.688224  | -1.801373 |
| 4             | 6             | 0           | -2.884144               | 1.286776  | -2.373193 |
| 5             | 7             | 0           | 0.396829                | 5.546712  | -0.815477 |
| 6             | 7             | 0           | 0.528682                | 5.271384  | -2.919661 |
| 7             | 6             | 0           | -3.075415               | 0.361368  | -3.439369 |
| 8             | 6             | 0           | -3.975692               | 2.133792  | -2.040805 |
| 9             | 6             | 0           | 1.021617                | 6.676704  | -1.335185 |
| 10            | 6             | 0           | 0.035834                | 5.397576  | 0.601397  |
| 11            | 6             | 0           | 1.109842                | 6.489328  | -2.654878 |
| 12            | 6             | 0           | 0.471117                | 4.665280  | -4.268931 |
| 13            | 6             | 0           | -4.322926               | 0.292536  | -4.057667 |
| 14            | 6             | 0           | -1.989021               | -0.581248 | -3.890065 |
| 15            | 6             | 0           | -5.163656               | 1.990392  | -2.719665 |
| 16            | 6             | 0           | -3.878478               | 3.219808  | -0.994347 |
| 17            | 6             | 0           | 1.487915                | 7.833464  | -0.494356 |
| 18            | 1             | 0           | 0.669077                | 6.172260  | 1.068065  |
| 19            | 6             | 0           | 0.512459                | 4.139480  | 1.209836  |
| 20            | 6             | 0           | -1.329278               | 5.787624  | 0.891532  |
| 21            | 6             | 0           | 1.707476                | 7.363112  | -3.694294 |
| 22            | 1             | 0           | 0.723033                | 5.499017  | -4.942023 |
| 23            | 6             | 0           | 1.487746                | 3.611768  | -4.433716 |
| 24            | 6             | 0           | -0.916603               | 4.252288  | -4.618220 |
| 25            | 1             | 0           | -4.456747               | -0.432401 | -4.865333 |
| 26            | 6             | 0           | -5.345375               | 1.097488  | -3.708378 |
| 27            | 1             | 0           | -1.031555               | -0.227564 | -3.462854 |
| 28            | 6             | 0           | -2.245532               | -1.929208 | -3.350639 |
| 29            | 6             | 0           | -1.820466               | -0.663464 | -5.292854 |
| 30            | 1             | 0           | -5.992805               | 2.648642  | -2.440702 |
| 31            | 1             | 0           | -2.880935               | 3.154269  | -0.517773 |
| 32            | 6             | 0           | -4.012911               | 4.594536  | -1.599969 |
| 33            | 6             | 0           | -4.864556               | 3.070672  | 0.129575  |
| 34            | 1             | 0           | 2.260360                | 7.530228  | 0.230444  |
| 35            | 1             | 0           | 0.660869                | 8.296803  | 0.066305  |
| 36            | 1             | 0           | 1.923895                | 8.605215  | -1.140797 |
| 37            | 1             | 0           | 0.442761                | 4.230098  | 2.303258  |
| 38            | 1             | 0           | 1.557706                | 3.938884  | 0.943991  |
| 39            | 1             | 0           | -0.072130               | 3.244849  | 0.936073  |
| 40            | 1             | 0           | -2.066612               | 5.075615  | 0.484965  |
| 41            | 1             | 0           | -1.575032               | 6.781083  | 0.485900  |
| 42            | 1             | 0           | -1.496672               | 5.814651  | 1.978569  |
| 43            | 1             | 0           | 2.109509                | 8.273675  | -3.233005 |
| 44            | 1             | 0           | 0.967470                | 7.676682  | -4.448606 |
| 45            | 1             | 0           | 2.537345                | 6.870211  | -4.226097 |
| 46            | 1             | 0           | 2.505732                | 3.988766  | -4.263036 |
| 47            | 1             | 0           | 1.458050                | 3.193765  | -5.450693 |

|     |    |   |           |           |           |
|-----|----|---|-----------|-----------|-----------|
| 48  | 1  | 0 | 1.343903  | 2.766405  | -3.737852 |
| 49  | 1  | 0 | -0.961178 | 3.951117  | -5.675115 |
| 50  | 1  | 0 | -1.644319 | 5.059459  | -4.453439 |
| 51  | 1  | 0 | -1.270989 | 3.370071  | -4.046404 |
| 52  | 1  | 0 | -6.310326 | 1.021481  | -4.216338 |
| 53  | 1  | 0 | -3.190115 | -2.341805 | -3.744892 |
| 54  | 1  | 0 | -2.318850 | -1.937022 | -2.252107 |
| 55  | 1  | 0 | -1.439083 | -2.625575 | -3.629111 |
| 56  | 1  | 0 | -0.962670 | -1.301977 | -5.556421 |
| 57  | 1  | 0 | -1.638170 | 0.314676  | -5.770872 |
| 58  | 1  | 0 | -2.690469 | -1.102034 | -5.813413 |
| 59  | 1  | 0 | -5.009935 | 4.733692  | -2.048430 |
| 60  | 1  | 0 | -3.267670 | 4.776143  | -2.391053 |
| 61  | 1  | 0 | -3.889924 | 5.379175  | -0.837138 |
| 62  | 1  | 0 | -4.736530 | 3.877645  | 0.868157  |
| 63  | 1  | 0 | -4.744984 | 2.118028  | 0.666032  |
| 64  | 1  | 0 | -5.904235 | 3.120421  | -0.232951 |
| 65  | 29 | 0 | -1.672541 | 0.943954  | 0.157321  |
| 66  | 7  | 0 | -1.566740 | 0.636696  | 2.022496  |
| 67  | 29 | 0 | -0.050654 | 0.394254  | -1.843203 |
| 68  | 29 | 0 | 0.050654  | -0.394254 | 1.843203  |
| 69  | 6  | 0 | -2.552081 | 0.097512  | 2.908394  |
| 70  | 7  | 0 | 1.566740  | -0.636696 | -2.022496 |
| 71  | 29 | 0 | 1.672541  | -0.943954 | -0.157321 |
| 72  | 6  | 0 | -3.374504 | -0.986592 | 2.529528  |
| 73  | 6  | 0 | -2.678670 | 0.642432  | 4.205552  |
| 74  | 6  | 0 | 2.552081  | -0.097512 | -2.908394 |
| 75  | 6  | 0 | -4.222557 | -1.516216 | 3.473172  |
| 76  | 6  | 0 | -3.356901 | -1.569752 | 1.135189  |
| 77  | 6  | 0 | -3.541507 | 0.059272  | 5.097084  |
| 78  | 6  | 0 | -1.938825 | 1.927296  | 4.587235  |
| 79  | 6  | 0 | 3.374504  | 0.986592  | -2.529528 |
| 80  | 6  | 0 | 2.678670  | -0.642432 | -4.205552 |
| 81  | 1  | 0 | -4.864552 | -2.360974 | 3.204128  |
| 82  | 6  | 0 | -4.301081 | -1.021008 | 4.739344  |
| 83  | 1  | 0 | -2.379310 | -1.327552 | 0.684887  |
| 84  | 6  | 0 | -4.460101 | -0.982768 | 0.312670  |
| 85  | 6  | 0 | -3.509923 | -3.099352 | 1.121105  |
| 86  | 1  | 0 | -3.641948 | 0.466754  | 6.105979  |
| 87  | 1  | 0 | -0.936820 | 1.837416  | 4.132454  |
| 88  | 6  | 0 | -2.594484 | 3.137592  | 3.960486  |
| 89  | 6  | 0 | -1.782848 | 2.116584  | 6.091431  |
| 90  | 6  | 0 | 4.222557  | 1.516216  | -3.473172 |
| 91  | 6  | 0 | 3.356901  | 1.569752  | -1.135189 |
| 92  | 6  | 0 | 3.541507  | -0.059272 | -5.097084 |
| 93  | 6  | 0 | 1.938825  | -1.927296 | -4.587235 |
| 94  | 1  | 0 | -4.985961 | -1.473206 | 5.463237  |
| 95  | 1  | 0 | -5.444974 | -1.213333 | 0.751434  |
| 96  | 1  | 0 | -4.455408 | -1.363431 | -0.722693 |
| 97  | 1  | 0 | -4.383833 | 0.113710  | 0.249577  |
| 98  | 1  | 0 | -4.485298 | -3.421760 | 1.518385  |
| 99  | 1  | 0 | -2.717497 | -3.593846 | 1.701642  |
| 100 | 1  | 0 | -3.454761 | -3.472478 | 0.085456  |

|     |    |   |           |           |           |
|-----|----|---|-----------|-----------|-----------|
| 101 | 1  | 0 | -3.620350 | 3.275992  | 4.341496  |
| 102 | 1  | 0 | -2.643381 | 3.014660  | 2.867919  |
| 103 | 1  | 0 | -2.028238 | 4.059780  | 4.181596  |
| 104 | 1  | 0 | -1.127999 | 2.977806  | 6.303810  |
| 105 | 1  | 0 | -1.343721 | 1.231114  | 6.576704  |
| 106 | 1  | 0 | -2.746876 | 2.323570  | 6.584463  |
| 107 | 1  | 0 | 4.864552  | 2.360974  | -3.204128 |
| 108 | 6  | 0 | 4.301081  | 1.021008  | -4.739344 |
| 109 | 1  | 0 | 2.379310  | 1.327552  | -0.684887 |
| 110 | 6  | 0 | 4.460101  | 0.982768  | -0.312670 |
| 111 | 6  | 0 | 3.509923  | 3.099352  | -1.121105 |
| 112 | 1  | 0 | 3.641948  | -0.466754 | -6.105979 |
| 113 | 1  | 0 | 0.936820  | -1.837416 | -4.132454 |
| 114 | 6  | 0 | 2.594484  | -3.137592 | -3.960486 |
| 115 | 6  | 0 | 1.782848  | -2.116584 | -6.091431 |
| 116 | 1  | 0 | 4.985961  | 1.473206  | -5.463237 |
| 117 | 1  | 0 | 5.444974  | 1.213333  | -0.751434 |
| 118 | 1  | 0 | 4.455408  | 1.363431  | 0.722693  |
| 119 | 1  | 0 | 4.383833  | -0.113710 | -0.249577 |
| 120 | 1  | 0 | 4.485298  | 3.421760  | -1.518385 |
| 121 | 1  | 0 | 2.717497  | 3.593846  | -1.701642 |
| 122 | 1  | 0 | 3.454761  | 3.472478  | -0.085456 |
| 123 | 1  | 0 | 3.620350  | -3.275992 | -4.341496 |
| 124 | 1  | 0 | 2.643381  | -3.014660 | -2.867919 |
| 125 | 1  | 0 | 2.028238  | -4.059780 | -4.181596 |
| 126 | 1  | 0 | 1.127999  | -2.977806 | -6.303810 |
| 127 | 1  | 0 | 1.343721  | -1.231114 | -6.576704 |
| 128 | 1  | 0 | 2.746876  | -2.323570 | -6.584463 |
| 129 | 32 | 0 | 0.759979  | -2.992280 | 1.667432  |
| 130 | 7  | 0 | 1.663012  | -1.346048 | 1.666165  |
| 131 | 6  | 0 | 2.884144  | -1.286776 | 2.373193  |
| 132 | 6  | 0 | -0.105647 | -4.688224 | 1.801373  |
| 133 | 6  | 0 | 3.075415  | -0.361368 | 3.439369  |
| 134 | 6  | 0 | 3.975692  | -2.133792 | 2.040805  |
| 135 | 7  | 0 | -0.396829 | -5.546712 | 0.815477  |
| 136 | 7  | 0 | -0.528682 | -5.271384 | 2.919661  |
| 137 | 6  | 0 | 4.322926  | -0.292536 | 4.057667  |
| 138 | 6  | 0 | 1.989021  | 0.581248  | 3.890065  |
| 139 | 6  | 0 | 5.163656  | -1.990392 | 2.719665  |
| 140 | 6  | 0 | 3.878478  | -3.219808 | 0.994347  |
| 141 | 6  | 0 | -1.021617 | -6.676704 | 1.335185  |
| 142 | 6  | 0 | -0.035834 | -5.397576 | -0.601397 |
| 143 | 6  | 0 | -1.109842 | -6.489328 | 2.654878  |
| 144 | 6  | 0 | -0.471117 | -4.665280 | 4.268931  |
| 145 | 1  | 0 | 4.456747  | 0.432401  | 4.865333  |
| 146 | 6  | 0 | 5.345375  | -1.097488 | 3.708378  |
| 147 | 1  | 0 | 1.031555  | 0.227564  | 3.462854  |
| 148 | 6  | 0 | 2.245532  | 1.929208  | 3.350639  |
| 149 | 6  | 0 | 1.820466  | 0.663464  | 5.292854  |
| 150 | 1  | 0 | 5.992805  | -2.648642 | 2.440702  |
| 151 | 1  | 0 | 2.880935  | -3.154269 | 0.517773  |
| 152 | 6  | 0 | 4.012911  | -4.594536 | 1.599969  |
| 153 | 6  | 0 | 4.864556  | -3.070672 | -0.129575 |

|     |   |   |           |           |           |
|-----|---|---|-----------|-----------|-----------|
| 154 | 6 | 0 | -1.487915 | -7.833464 | 0.494356  |
| 155 | 1 | 0 | -0.669077 | -6.172260 | -1.068065 |
| 156 | 6 | 0 | -0.512459 | -4.139480 | -1.209836 |
| 157 | 6 | 0 | 1.329278  | -5.787624 | -0.891532 |
| 158 | 6 | 0 | -1.707476 | -7.363112 | 3.694294  |
| 159 | 1 | 0 | -0.723033 | -5.499017 | 4.942023  |
| 160 | 6 | 0 | -1.487746 | -3.611768 | 4.433716  |
| 161 | 6 | 0 | 0.916603  | -4.252288 | 4.618220  |
| 162 | 1 | 0 | 6.310326  | -1.021481 | 4.216338  |
| 163 | 1 | 0 | 3.190115  | 2.341805  | 3.744892  |
| 164 | 1 | 0 | 2.318850  | 1.937022  | 2.252107  |
| 165 | 1 | 0 | 1.439083  | 2.625575  | 3.629111  |
| 166 | 1 | 0 | 0.962670  | 1.301977  | 5.556421  |
| 167 | 1 | 0 | 1.638170  | -0.314676 | 5.770872  |
| 168 | 1 | 0 | 2.690469  | 1.102034  | 5.813413  |
| 169 | 1 | 0 | 5.009935  | -4.733692 | 2.048430  |
| 170 | 1 | 0 | 3.267670  | -4.776143 | 2.391053  |
| 171 | 1 | 0 | 3.889924  | -5.379175 | 0.837138  |
| 172 | 1 | 0 | 4.736530  | -3.877645 | -0.868157 |
| 173 | 1 | 0 | 4.744984  | -2.118028 | -0.666032 |
| 174 | 1 | 0 | 5.904235  | -3.120421 | 0.232951  |
| 175 | 1 | 0 | -2.260360 | -7.530228 | -0.230444 |
| 176 | 1 | 0 | -0.660869 | -8.296803 | -0.066305 |
| 177 | 1 | 0 | -1.923895 | -8.605215 | 1.140797  |
| 178 | 1 | 0 | -0.442761 | -4.230098 | -2.303258 |
| 179 | 1 | 0 | -1.557706 | -3.938884 | -0.943991 |
| 180 | 1 | 0 | 0.072130  | -3.244849 | -0.936073 |
| 181 | 1 | 0 | 2.066612  | -5.075615 | -0.484965 |
| 182 | 1 | 0 | 1.575032  | -6.781083 | -0.485900 |
| 183 | 1 | 0 | 1.496672  | -5.814651 | -1.978569 |
| 184 | 1 | 0 | -2.109509 | -8.273675 | 3.233005  |
| 185 | 1 | 0 | -0.967470 | -7.676682 | 4.448606  |
| 186 | 1 | 0 | -2.537345 | -6.870211 | 4.226097  |
| 187 | 1 | 0 | -2.505732 | -3.988766 | 4.263036  |
| 188 | 1 | 0 | -1.458050 | -3.193765 | 5.450693  |
| 189 | 1 | 0 | -1.343903 | -2.766405 | 3.737852  |
| 190 | 1 | 0 | 0.961178  | -3.951117 | 5.675115  |
| 191 | 1 | 0 | 1.644319  | -5.059459 | 4.453439  |
| 192 | 1 | 0 | 1.270989  | -3.370071 | 4.046404  |

---

**Table S 3 Crystal data and structural refinement (1-4)**

| Identification code                                   | [ArN(H)] <sub>2</sub> Ge←NHC                                      | [ArN(H)Li←NHC] <sub>2</sub>                                       | [NHC→GeN(Ar)Cu <sub>2</sub> N)Ar] <sub>2</sub>                                  | ArNNAr                                                            |
|-------------------------------------------------------|-------------------------------------------------------------------|-------------------------------------------------------------------|---------------------------------------------------------------------------------|-------------------------------------------------------------------|
|                                                       | (1)                                                               | (2)                                                               | (3)                                                                             | (4)                                                               |
| CCDC                                                  | 2201109                                                           | 2201110                                                           | 2201111                                                                         | 2201112                                                           |
| Empirical formula                                     | C <sub>35</sub> H <sub>56</sub> GeN <sub>4</sub>                  | C <sub>46</sub> H <sub>74</sub> Li <sub>2</sub> N <sub>6</sub>    | C <sub>70</sub> H <sub>108</sub> Cu <sub>4</sub> Ge <sub>2</sub> N <sub>8</sub> | C <sub>24</sub> H <sub>34</sub> N <sub>2</sub>                    |
| Formula weight                                        | 605.42                                                            | 724.99                                                            | 1460.98                                                                         | 350.53                                                            |
| Temperature/K                                         | 296(2)                                                            | 296(2)                                                            | 296(2)                                                                          | 296(2)                                                            |
| Crystal system                                        | Triclinic                                                         | Triclinic                                                         | Monoclinic                                                                      | Orthorhombic                                                      |
| Space group                                           | <i>P</i> -1                                                       | <i>P</i> -1                                                       | <i>P</i> 2 <sub>1</sub> / <i>n</i>                                              | <i>Aea</i> 2                                                      |
| <i>a</i> /Å                                           | 11.128(3)                                                         | 10.2780(4)                                                        | 13.4421(2)                                                                      | 16.1758(9)                                                        |
| <i>b</i> /Å                                           | 11.721(3)                                                         | 10.8626(4)                                                        | 19.1200(3)                                                                      | 14.0586(6)                                                        |
| <i>c</i> /Å                                           | 15.731(4)                                                         | 11.2179(5)                                                        | 14.3811(3)                                                                      | 9.7277(5)                                                         |
| <i>α</i> /°                                           | 108.667(13)                                                       | 104.378(2)                                                        | 90                                                                              | 90                                                                |
| <i>β</i> /°                                           | 90.773(13)                                                        | 98.823(2)                                                         | 101.6620(10)                                                                    | 90                                                                |
| <i>γ</i> /°                                           | 115.078(13)                                                       | 99.932(2)                                                         | 90                                                                              | 90                                                                |
| Volume/Å <sup>3</sup>                                 | 1733.8(8)                                                         | 1169.48(8)                                                        | 3619.83(11)                                                                     | 2212.17(19)                                                       |
| <i>Z</i>                                              | 2                                                                 | 1                                                                 | 2                                                                               | 4                                                                 |
| $\rho_{\text{calc}}$ /g/cm <sup>3</sup>               | 1.160                                                             | 1.029                                                             | 1.340                                                                           | 1.052                                                             |
| $\mu$ /mm <sup>-1</sup>                               | 0.911                                                             | 0.060                                                             | 2.017                                                                           | 0.061                                                             |
| F(000)                                                | 652.0                                                             | 398.0                                                             | 1528.0                                                                          | 768.0                                                             |
| Crystal size/mm <sup>3</sup>                          | 0.173×0.124×0.086                                                 | 0.70×0.545×0.222                                                  | 0.80×0.71×0.59                                                                  | 0.43×0.30×0.12                                                    |
| Radiation (Å)                                         | MoK $\alpha$                                                      | MoK $\alpha$                                                      | MoK $\alpha$                                                                    | MoK $\alpha$                                                      |
|                                                       | ( $\lambda$ = 0.71073)                                            | ( $\lambda$ = 0.71073)                                            | ( $\lambda$ = 0.71073)                                                          | ( $\lambda$ = 0.71073)                                            |
| 2 $\theta$ range for data collection/°                | 4.05 to 54.79                                                     | 3.83 to 55.004                                                    | 3.784 to 55.032                                                                 | 5.036 to 54.764                                                   |
| Index ranges                                          | -14 ≤ <i>h</i> ≤ 13<br>-15 ≤ <i>k</i> ≤ 15<br>-19 ≤ <i>l</i> ≤ 20 | -13 ≤ <i>h</i> ≤ 13<br>-14 ≤ <i>k</i> ≤ 14<br>-14 ≤ <i>l</i> ≤ 14 | -17 ≤ <i>h</i> ≤ 15<br>-24 ≤ <i>k</i> ≤ 24<br>-18 ≤ <i>l</i> ≤ 17               | -20 ≤ <i>h</i> ≤ 20<br>-17 ≤ <i>k</i> ≤ 18<br>-12 ≤ <i>l</i> ≤ 12 |
| Reflections collected                                 | 27349                                                             | 18908                                                             | 33050                                                                           | 17366                                                             |
| Independent reflections                               | R <sub>int</sub> = 0.0612<br>R <sub>sigma</sub> = 0.0654          | R <sub>int</sub> = 0.0285<br>R <sub>sigma</sub> = 0.0258          | R <sub>int</sub> = 0.0674<br>R <sub>sigma</sub> = 0.0839                        | R <sub>int</sub> = 0.0189<br>R <sub>sigma</sub> = 0.0130          |
| Data/restraints/parameters                            | 7718/0/382                                                        | 5248/0/257                                                        | 8306/2/398                                                                      | 2465/1/123                                                        |
| Goodness-of-fit on F <sup>2</sup>                     | 1.002                                                             | 1.047                                                             | 0.975                                                                           | 1.034                                                             |
| Final R indexes [ <i>I</i> ≥ 2 $\sigma$ ( <i>I</i> )] | R <sub>1</sub> = 0.0416<br>wR <sub>2</sub> = 0.0991               | R <sub>1</sub> = 0.0642<br>wR <sub>2</sub> = 0.1935               | R <sub>1</sub> = 0.0557<br>wR <sub>2</sub> = 0.1309                             | R <sub>1</sub> = 0.0438<br>wR <sub>2</sub> = 0.1222               |
| Final R indexes [all data]                            | R <sub>1</sub> = 0.0636<br>wR <sub>2</sub> = 0.1073               | R <sub>1</sub> = 0.0908<br>wR <sub>2</sub> = 0.2169               | R <sub>1</sub> = 0.1337<br>wR <sub>2</sub> = 0.1644                             | R <sub>1</sub> = 0.0549<br>wR <sub>2</sub> = 0.1312               |
| Largest diff. peak/hole / e Å <sup>-3</sup>           | 0.51/-0.39                                                        | 0.36/-0.29                                                        | 0.57/-0.64                                                                      | 0.22/-0.12                                                        |



## References

1. S. Yuan, X. Wei, H. Tong, L. Zhang, D. Liu and W.-H. Sun, *Organometallics*, 2010, **29**, 2085-2092.
2. N. Kuhn and T. Kratz, *Synthesis*, 1993, **1993**, 561-562.
3. G. M. Sheldrick, *Acta Crystallogr., Sect. C: Cryst. Struct. Commun.*, 2015, **71**, 3-8.
4. M. J. Frisch, G. W. Trucks, H. B. Schlegel, G. E. Scuseria, M. A. Robb and J. R. Cheeseman, *Gaussian 16 Rev. C.01*, Wallingford, CT, 2016.
5. A. E. Reed, L. A. Curtiss and F. Weinhold, *Chem. Rev.*, 1988, **88**, 899-926.
6. T. Lu and F. Chen, *J. Comput. Chem.*, 2012, **33**, 580-592.
7. J. P. Perdew, K. Burke and M. Ernzerhof, *Phys. Rev. Lett.*, 1996, **77**, 3865-3868.
8. N. J. Bunce, G. Ferguson, C. L. Forber and G. J. Stachnyk, *J. Org. Chem.*, 1987, **52**, 394-398.
9. M. I. Lipschutz and T. D. Tilley, *Chem. Commun.*, 2012, **48**, 7146-7148.
10. O. V. Dolomanov, L. J. Bourhis, R. J. Gildea, J. A. K. Howard and H. Puschmann, *J. Appl. Cryst.*, 2009, **42**, 339-341.
